# Supplementary material
Source: PubMed Central journal article supplement (PMC4214251)
Supplement: NIHMS635292-supplement-2.pdf [file NIHMS635292-supplement-2.pdf]

**Supplementary Table 1. Genotype frequency of SNPs in European American (EA) and African American (AA) controls.**

| SNP Information |            |     |     |      | Genotype Frequency |      |     |      |                      |
|-----------------|------------|-----|-----|------|--------------------|------|-----|------|----------------------|
| Gene            | SNP        | Min | Maj | Geno | EA                 |      | AA  |      | P value <sup>a</sup> |
|                 |            |     |     |      | N                  | %    | N   | %    |                      |
| <i>COMT</i>     | rs4633     | A   | G   | AA   | 169                | 26.0 | 77  | 10.4 | 1.32E-20             |
|                 |            |     |     | AG   | 312                | 48.1 | 316 | 42.6 |                      |
|                 |            |     |     | GG   | 168                | 25.9 | 348 | 47.0 |                      |
| <i>CYP17A1</i>  | rs10883782 | G   | A   | AA   | 425                | 65.9 | 595 | 80.3 | 3.11E-09             |
|                 |            |     |     | GA   | 194                | 30.1 | 136 | 18.4 |                      |
|                 |            |     |     | GG   | 26                 | 4.0  | 10  | 1.3  |                      |
| <i>CYP17A1</i>  | rs12413409 | A   | G   | AA   | 6                  | 0.9  | 1   | 0.1  | 0.0001               |
|                 |            |     |     | AG   | 109                | 16.8 | 76  | 10.2 |                      |
|                 |            |     |     | GG   | 532                | 82.2 | 665 | 89.6 |                      |
| <i>CYP17A1</i>  | rs2486758  | G   | A   | AA   | 414                | 63.8 | 646 | 86.8 | 9.52E-23             |
|                 |            |     |     | GA   | 211                | 32.5 | 90  | 12.1 |                      |
|                 |            |     |     | GG   | 24                 | 3.7  | 8   | 1.1  |                      |
| <i>CYP17A1</i>  | rs6162     | A   | G   | AA   | 118                | 18.2 | 110 | 14.8 | 0.10                 |
|                 |            |     |     | AG   | 318                | 49.1 | 324 | 43.6 |                      |
|                 |            |     |     | GG   | 211                | 32.6 | 309 | 41.6 |                      |
| <i>CYP17A1</i>  | rs619824   | A   | C   | AA   | 128                | 19.8 | 299 | 40.2 | 5.30E-23             |
|                 |            |     |     | CA   | 311                | 48.0 | 344 | 46.3 |                      |
|                 |            |     |     | CC   | 209                | 32.3 | 100 | 13.5 |                      |
| <i>CYP19A1</i>  | rs10046    | G   | A   | AA   | 182                | 28.0 | 44  | 5.9  | 4.73E-51             |
|                 |            |     |     | AG   | 330                | 50.8 | 274 | 36.9 |                      |
|                 |            |     |     | GG   | 137                | 21.1 | 425 | 57.2 |                      |
| <i>CYP19A1</i>  | rs11575899 | D   | I   | DD   | 78                 | 12.0 | 87  | 11.7 | 0.69                 |
|                 |            |     |     | DI   | 292                | 45.0 | 319 | 43.0 |                      |
|                 |            |     |     | II   | 279                | 43.0 | 336 | 45.3 |                      |
| <i>CYP19A1</i>  | rs2445765  | G   | C   | CC   | 434                | 66.9 | 412 | 55.5 | 2.30E-05             |
|                 |            |     |     | GC   | 191                | 29.4 | 278 | 37.4 |                      |
|                 |            |     |     | GG   | 24                 | 3.7  | 53  | 7.1  |                      |
| <i>CYP19A1</i>  | rs4775936  | A   | G   | AA   | 142                | 21.9 | 21  | 2.8  | 1.08E-69             |
|                 |            |     |     | AG   | 330                | 50.9 | 179 | 24.1 |                      |
|                 |            |     |     | GG   | 176                | 27.2 | 544 | 73.1 |                      |
| <i>CYP19A1</i>  | rs700518   | A   | G   | AA   | 152                | 23.4 | 477 | 64.2 | 3.38E-59             |
|                 |            |     |     | GA   | 335                | 51.6 | 235 | 31.6 |                      |
|                 |            |     |     | GG   | 162                | 25.0 | 31  | 4.2  |                      |
| <i>CYP19A1</i>  | rs700519   | A   | G   | AA   | 1                  | 0.2  | 24  | 3.2  | 1.02E-28             |
|                 |            |     |     | AG   | 42                 | 6.5  | 204 | 27.4 |                      |
|                 |            |     |     | GG   | 605                | 93.4 | 516 | 69.4 |                      |
| <i>CYP19A1</i>  | rs727479   | C   | A   | AA   | 277                | 42.7 | 465 | 62.5 | 6.00E-15             |

|                |           |   |   |    |     |      |     |       |           |
|----------------|-----------|---|---|----|-----|------|-----|-------|-----------|
|                |           |   |   | CA | 291 | 44.9 | 247 | 33.2  |           |
|                |           |   |   | CC | 80  | 12.3 | 32  | 4.3   |           |
| <i>CYP19A1</i> | rs749292  | A | G | AA | 133 | 20.5 | 175 | 23.5  | 0.40      |
|                |           |   |   | AG | 332 | 51.2 | 367 | 49.3  |           |
|                |           |   |   | GG | 184 | 28.4 | 202 | 27.2  |           |
| <i>CYP1A1</i>  | rs1378942 | C | A | AA | 243 | 37.6 | 11  | 1.5   | 2.18E-157 |
|                |           |   |   | AC | 325 | 50.2 | 117 | 15.7  |           |
|                |           |   |   | CC | 79  | 12.2 | 616 | 82.8  |           |
| <i>CYP1A1</i>  | rs1799814 | A | C | AA | 9   | 1.4  | 0   | 0.0   | 1.92E-17  |
|                |           |   |   | AC | 73  | 11.3 | 8   | 1.1   |           |
|                |           |   |   | CC | 566 | 87.3 | 735 | 98.9  |           |
| <i>CYP1A2</i>  | rs2470893 | A | G | AA | 42  | 6.5  | 3   | 0.4   | 4.03E-51  |
|                |           |   |   | AG | 248 | 38.2 | 65  | 8.7   |           |
|                |           |   |   | GG | 359 | 55.3 | 675 | 90.8  |           |
| <i>CYP1A2</i>  | rs2472297 | A | G | AA | 18  | 2.8  | 2   | 0.3   | 2.77E-26  |
|                |           |   |   | AG | 176 | 27.2 | 55  | 7.4   |           |
|                |           |   |   | GG | 454 | 70.1 | 687 | 92.3  |           |
| <i>CYP1A2</i>  | rs2472304 | G | A | AA | 231 | 35.9 | 11  | 1.5   | 5.28E-144 |
|                |           |   |   | AG | 326 | 50.6 | 132 | 17.8  |           |
|                |           |   |   | GG | 87  | 13.5 | 598 | 80.7  |           |
| <i>CYP1A2</i>  | rs762551  | C | A | AA | 306 | 47.2 | 251 | 33.8  | 6.77E-12  |
|                |           |   |   | CA | 297 | 45.8 | 354 | 47.6  |           |
|                |           |   |   | CC | 45  | 6.9  | 138 | 18.6  |           |
| <i>CYP1B1</i>  | rs1056836 | C | G | CC | 120 | 18.5 | 418 | 56.2  | 9.87E-59  |
|                |           |   |   | GC | 333 | 51.4 | 287 | 38.6  |           |
|                |           |   |   | GG | 195 | 30.1 | 39  | 5.2   |           |
| <i>CYP1B1</i>  | rs1800440 | G | A | AA | 447 | 69.3 | 699 | 94.5  | 6.55E-34  |
|                |           |   |   | GA | 175 | 27.1 | 37  | 5.0   |           |
|                |           |   |   | GG | 23  | 3.6  | 4   | 0.5   |           |
| <i>CYP2C9</i>  | rs1057910 | C | A | AA | 542 | 84.4 | 716 | 97.4  | 1.00E-16  |
|                |           |   |   | CA | 96  | 15.0 | 19  | 2.6   |           |
|                |           |   |   | CC | 4   | 0.6  | 0   | 0.0   |           |
| <i>CYP3A4</i>  | rs4987161 | G | A | AA | 640 | 98.8 | 742 | 100.0 | 0.05      |
|                |           |   |   | GA | 7   | 1.1  | 0   | 0.0   |           |
|                |           |   |   | GG | 1   | 0.2  | 0   | 0.0   |           |
| <i>CYP3A5</i>  | rs776746  | A | G | AA | 3   | 0.5  | 364 | 48.9  | 5.90E-178 |
|                |           |   |   | AG | 92  | 14.2 | 300 | 40.3  |           |
|                |           |   |   | GG | 553 | 85.3 | 80  | 10.8  |           |
| <i>CYP3A7</i>  | rs2257401 | C | G | CC | 6   | 0.9  | 196 | 26.6  | 1.26E-116 |
|                |           |   |   | CG | 104 | 16.0 | 379 | 51.4  |           |
|                |           |   |   | GG | 538 | 83.0 | 162 | 22.0  |           |
| <i>ESR1</i>    | rs1801132 | C | G | CC | 19  | 2.9  | 6   | 0.8   | 9.32E-06  |

|                |           |   |   |    |     |      |     |      |           |
|----------------|-----------|---|---|----|-----|------|-----|------|-----------|
|                |           |   |   | CG | 188 | 29.0 | 154 | 20.8 |           |
|                |           |   |   | GG | 442 | 68.1 | 582 | 78.4 |           |
| <i>ESR1</i>    | rs2046210 | A | G | AA | 72  | 11.1 | 312 | 42.0 | 2.35E-45  |
|                |           |   |   | GA | 317 | 48.8 | 320 | 43.1 |           |
|                |           |   |   | GG | 260 | 40.1 | 110 | 14.8 |           |
| <i>ESR1</i>    | rs2228480 | A | G | AA | 18  | 2.8  | 17  | 2.3  | 0.82      |
|                |           |   |   | AG | 167 | 26.1 | 197 | 26.9 |           |
|                |           |   |   | GG | 454 | 71.0 | 519 | 70.8 |           |
| <i>ESR1</i>    | rs2234693 | G | A | AA | 188 | 29.0 | 170 | 22.9 | 3.84E-05  |
|                |           |   |   | GA | 338 | 52.2 | 359 | 48.3 |           |
|                |           |   |   | GG | 122 | 18.8 | 214 | 28.8 |           |
| <i>ESR1</i>    | rs3020314 | G | A | AA | 339 | 52.2 | 58  | 7.8  | 1.30E-98  |
|                |           |   |   | AG | 258 | 39.8 | 302 | 40.6 |           |
|                |           |   |   | GG | 52  | 8.0  | 384 | 51.6 |           |
| <i>ESR1</i>    | rs3798577 | G | A | AA | 203 | 31.3 | 248 | 33.5 | 0.68      |
|                |           |   |   | GA | 314 | 48.5 | 345 | 46.6 |           |
|                |           |   |   | GG | 131 | 20.2 | 148 | 20.0 |           |
| <i>ESR1</i>    | rs9383938 | A | C | AA | 6   | 0.9  | 15  | 2.0  | 3.18E-06  |
|                |           |   |   | AC | 113 | 17.4 | 207 | 27.9 |           |
|                |           |   |   | CC | 530 | 81.7 | 521 | 70.1 |           |
| <i>ESR1</i>    | rs9397435 | G | A | AA | 552 | 85.1 | 610 | 82.0 | 0.31      |
|                |           |   |   | GA | 92  | 14.2 | 127 | 17.1 |           |
|                |           |   |   | GG | 5   | 0.8  | 7   | 0.9  |           |
| <i>ESR2</i>    | rs1255998 | G | C | CC | 514 | 79.3 | 155 | 20.9 | 7.96E-110 |
|                |           |   |   | GC | 127 | 19.6 | 381 | 51.3 |           |
|                |           |   |   | GG | 7   | 1.1  | 207 | 27.9 |           |
| <i>ESR2</i>    | rs1256049 | A | G | AA | 1   | 0.2  | 11  | 1.5  | 4.78E-13  |
|                |           |   |   | AG | 35  | 5.4  | 130 | 17.5 |           |
|                |           |   |   | GG | 611 | 94.4 | 602 | 81.0 |           |
| <i>ESR2</i>    | rs1256065 | C | A | AA | 231 | 35.6 | 579 | 77.9 | 1.45E-61  |
|                |           |   |   | CA | 298 | 45.9 | 152 | 20.5 |           |
|                |           |   |   | CC | 120 | 18.5 | 12  | 1.6  |           |
| <i>ESR2</i>    | rs2987983 | G | A | AA | 280 | 43.2 | 134 | 18.0 | 7.49E-33  |
|                |           |   |   | GA | 291 | 44.9 | 354 | 47.6 |           |
|                |           |   |   | GG | 77  | 11.9 | 256 | 34.4 |           |
| <i>ESR2</i>    | rs3020450 | A | G | AA | 75  | 11.6 | 130 | 17.5 | 0.06      |
|                |           |   |   | AG | 304 | 46.8 | 358 | 48.2 |           |
|                |           |   |   | GG | 270 | 41.6 | 254 | 34.2 |           |
| <i>HSD17B2</i> | rs4445895 | A | G | AA | 109 | 16.8 | 75  | 10.1 | 5.01E-07  |
|                |           |   |   | AG | 313 | 48.2 | 311 | 41.9 |           |
|                |           |   |   | GG | 227 | 35.0 | 357 | 48.0 |           |
| <i>PR</i>      | rs1042838 | A | C | AA | 18  | 2.8  | 0   | 0.0  | 3.79E-32  |

|                |            |   |   |    |     |      |     |      |          |
|----------------|------------|---|---|----|-----|------|-----|------|----------|
|                |            |   |   | AC | 184 | 28.7 | 49  | 6.7  |          |
|                |            |   |   | CC | 439 | 68.5 | 686 | 93.3 |          |
| <i>SRD5A1</i>  | rs3736316  | A | G | AA | 114 | 17.6 | 70  | 9.4  | 3.16E-07 |
|                |            |   |   | AG | 309 | 47.7 | 329 | 44.2 |          |
|                |            |   |   | GG | 225 | 34.7 | 345 | 46.4 |          |
| <i>SRD5A1</i>  | rs3822430  | G | A | AA | 226 | 34.9 | 346 | 46.6 | 1.42E-07 |
|                |            |   |   | GA | 306 | 47.2 | 328 | 44.1 |          |
|                |            |   |   | GG | 116 | 17.9 | 69  | 9.3  |          |
| <i>SRD5A2</i>  | rs523349   | G | C | CC | 318 | 49.1 | 374 | 50.3 | 0.25     |
|                |            |   |   | GC | 262 | 40.5 | 312 | 41.9 |          |
|                |            |   |   | GG | 67  | 10.4 | 58  | 7.8  |          |
| <i>UGT1A1</i>  | rs10929302 | A | G | AA | 69  | 10.6 | 65  | 8.8  | 0.18     |
|                |            |   |   | AG | 285 | 43.9 | 305 | 41.2 |          |
|                |            |   |   | GG | 295 | 45.5 | 371 | 50.1 |          |
| <i>UGT1A1</i>  | rs4124874  | C | A | AA | 187 | 28.8 | 20  | 2.7  | 7.47E-63 |
|                |            |   |   | AC | 297 | 45.8 | 246 | 33.1 |          |
|                |            |   |   | CC | 165 | 25.4 | 477 | 64.2 |          |
| <i>UGT1A6</i>  | rs2070959  | G | A | AA | 261 | 40.4 | 446 | 60.0 | 1.81E-12 |
|                |            |   |   | GA | 311 | 48.1 | 248 | 33.4 |          |
|                |            |   |   | GG | 74  | 11.5 | 49  | 6.6  |          |
| <i>UGT1A9</i>  | rs6714486  | A | T | AA | 2   | 0.3  | 26  | 3.5  | 6.99E-19 |
|                |            |   |   | AT | 61  | 9.5  | 189 | 25.7 |          |
|                |            |   |   | TT | 579 | 90.2 | 519 | 70.7 |          |
| <i>UGT2B15</i> | rs1902023  | C | A | AA | 168 | 25.9 | 145 | 19.5 | 0.001    |
|                |            |   |   | AC | 329 | 50.8 | 357 | 48.0 |          |
|                |            |   |   | CC | 151 | 23.3 | 242 | 32.5 |          |

Abbreviations: Min, minor allele; Maj, major allele; Geno, genotype.

<sup>a</sup>To compare genotype frequencies between EA and AA women, *p* values were calculated using Chi-square tests or Fisher's Exact tests and adjusted for multiple testing.
