# Supplementary material
Source: PubMed Central journal article supplement (PMC4214251)
Supplement: NIHMS635292-supplement-3.pdf [file NIHMS635292-supplement-3.pdf]

**Supplementary Table 2. ORs and 95% CIs of all SNPs among all European American and African American women in WCHS.**

| Gene           | SNP        | Chr. | Genotype           | European American Women |                        |                |         | African American Women |                        |                |             |
|----------------|------------|------|--------------------|-------------------------|------------------------|----------------|---------|------------------------|------------------------|----------------|-------------|
|                |            |      |                    | Case/Control            | OR(95%CI) <sup>a</sup> | P <sup>b</sup> | P-trend | Case/Control           | OR(95%CI) <sup>a</sup> | P <sup>b</sup> | P-trend     |
| <i>COMT</i>    | rs4633     | 22   | GG                 | 148/165                 | 1.00                   | 0.47           | 0.89    | 57/76                  | 1.00                   | 0.47           | 0.73        |
|                |            |      | GA                 | 323/304                 | 1.17 (0.88-1.56)       |                |         | 274/313                | 1.20 (0.81-1.78)       |                |             |
|                |            |      | AA                 | 164/167                 | 1.03 (0.74-1.42)       |                |         | 273/344                | 1.06 (0.71-1.57)       |                |             |
|                |            |      | GA/AA <sup>c</sup> | 487/471                 | 1.12 (0.86-1.47)       | 0.41           |         | 547/657                | 1.13 (0.77-1.64)       | 0.54           |             |
| <i>CYP17A1</i> | rs10883782 | 10   | AA                 | 429/414                 | 1.00                   | 0.67           | 0.39    | 468/588                | 1.00                   | 0.31           | 0.42        |
|                |            |      | AG                 | 185/192                 | 0.93 (0.72-1.20)       |                |         | 126/135                | 1.21 (0.91-1.6)        |                |             |
|                |            |      | GG                 | 22/26                   | 0.78 (0.43-1.45)       |                |         | 7/10                   | 0.7 (0.26-1.89)        |                |             |
|                |            |      | AG/GG              | 207/218                 | 0.91 (0.71-1.17)       | 0.47           |         | 133/145                | 1.17 (0.89-1.54)       | 0.27           |             |
| <i>CYP17A1</i> | rs12413409 | 10   | GG                 | 513/519                 | 1.00                   | 0.59           | 0.49    | 544/659                | 1.00                   | 1.00           | N/A         |
|                |            |      | GA                 | 114/109                 | 1.05 (0.77-1.42)       |                |         | 60/74                  | 1.00 (0.69-1.45)       |                |             |
|                |            |      | AA                 | 8/6                     | 1.80 (0.57-5.67)       |                |         | 0/1                    | N/A                    |                |             |
|                |            |      | GA/AA              | 122/115                 | 1.08 (0.80-1.45)       | 0.62           |         | 60/75                  | 0.98 (0.68-1.43)       | 0.93           |             |
| <i>CYP17A1</i> | rs2486758  | 10   | AA                 | 390/405                 | 1.00                   | 0.59           | 0.47    | 529/640                | 1.00                   | 0.13           | 0.78        |
|                |            |      | AG                 | 220/207                 | 1.14 (0.89-1.46)       |                |         | 76/88                  | 1.13 (0.80-1.60)       |                |             |
|                |            |      | GG                 | 27/24                   | 0.98 (0.54-1.79)       |                |         | 1/8                    | 0.13 (0.02-1.08)       |                |             |
|                |            |      | AG/GG              | 247/231                 | 1.12 (0.88-1.42)       | 0.36           |         | 77/96                  | 1.04 (0.74-1.46)       | 0.81           |             |
| <i>CYP17A1</i> | rs6162     | 10   | GG                 | 226/207                 | 1.00                   | 0.81           | 0.66    | 229/306                | 1.00                   | 0.21           | 0.57        |
|                |            |      | GA                 | 298/311                 | 0.92 (0.71-1.19)       |                |         | 291/320                | 1.22 (0.96-1.56)       |                |             |
|                |            |      | AA                 | 113/116                 | 0.94 (0.67-1.32)       |                |         | 86/109                 | 0.99 (0.70-1.40)       |                |             |
|                |            |      | GA/AA              | 411/427                 | 0.93 (0.72-1.18)       | 0.53           |         | 377/429                | 1.16 (0.93-1.46)       | 0.19           |             |
| <i>CYP17A1</i> | rs619824   | 10   | CC                 | 210/205                 | 1.00                   | 0.96           | 0.87    | 81/99                  | 1.00                   | 0.95           | 0.77        |
|                |            |      | CA                 | 303/304                 | 1.01 (0.78-1.31)       |                |         | 275/338                | 1.00 (0.71-1.41)       |                |             |
|                |            |      | AA                 | 125/126                 | 0.97 (0.69-1.35)       |                |         | 249/298                | 0.96 (0.68-1.37)       |                |             |
|                |            |      | CA/AA              | 428/430                 | 1 (0.78-1.28)          | 0.98           |         | 524/636                | 0.98 (0.71-1.36)       | 0.91           |             |
| <i>CYP19A1</i> | rs10046    | 15   | AA                 | 175/179                 | 1.00                   | 0.96           | 0.77    | 42/44                  | 1.00                   | 0.15           | 0.53        |
|                |            |      | AG                 | 322/320                 | 0.98 (0.75-1.29)       |                |         | 208/271                | 0.7 (0.43-1.13)        |                |             |
|                |            |      | GG                 | 140/137                 | 0.95 (0.68-1.33)       |                |         | 354/420                | 0.86 (0.54-1.37)       |                |             |
|                |            |      | AG/GG              | 462/457                 | 0.97 (0.75-1.26)       | 0.82           |         | 562/691                | 0.79 (0.51-1.25)       | 0.32           |             |
| <i>CYP19A1</i> | rs11575899 | 15   | II                 | 264/274                 | 1.00                   | 0.27           | 0.70    | 287/332                | 1.00                   | 0.59           | 0.97        |
|                |            |      | ID                 | 307/284                 | 1.11 (0.87-1.42)       |                |         | 241/316                | 0.92 (0.72-1.16)       |                |             |
|                |            |      | DD                 | 66/78                   | 0.81 (0.55-1.2)        |                |         | 75/86                  | 1.09 (0.76-1.57)       |                |             |
|                |            |      | ID/DD              | 373/362                 | 1.04 (0.83-1.32)       | 0.72           |         | 316/402                | 0.95 (0.76-1.19)       | 0.67           |             |
| <i>CYP19A1</i> | rs2445765  | 15   | CC                 | 441/428                 | 1.00                   | 0.29           | 0.17    | 356/407                | 1.00                   | 0.27           | 0.14        |
|                |            |      | CG                 | 185/185                 | 0.90 (0.70-1.17)       |                |         | 221/275                | 0.91 (0.72-1.16)       |                |             |
|                |            |      | GG                 | 12/23                   | 0.58 (0.28-1.22)       |                |         | 29/53                  | 0.67 (0.41-1.11)       |                |             |
|                |            |      | CG/GG              | 197/208                 | 0.87 (0.68-1.12)       | 0.28           |         | 250/328                | 0.88 (0.7-1.1)         | 0.26           |             |
| <i>CYP19A1</i> | rs4775936  | 15   | GG                 | 166/175                 | 1.00                   | 0.46           | 0.42    | 447/538                | 1.00                   | 0.59           | 0.86        |
|                |            |      | GA                 | 336/321                 | 1.19 (0.9-1.58)        |                |         | 139/177                | 0.9 (0.69-1.19)        |                |             |
|                |            |      | AA                 | 134/139                 | 1.14 (0.81-1.59)       |                |         | 19/21                  | 1.24 (0.64-2.4)        |                |             |
|                |            |      | GA/AA              | 470/460                 | 1.18 (0.9-1.53)        | 0.23           |         | 158/198                | 0.94 (0.72-1.21)       | 0.63           |             |
| <i>CYP19A1</i> | rs700518   | 15   | GG                 | 149/159                 | 1.00                   | 0.91           | 0.87    | 27/31                  | 1.00                   | 0.83           | 0.94        |
|                |            |      | GA                 | 333/325                 | 1.03 (0.78-1.37)       |                |         | 190/232                | 0.85 (0.48-1.51)       |                |             |
|                |            |      | AA                 | 155/152                 | 0.97 (0.69-1.36)       |                |         | 388/472                | 0.9 (0.52-1.56)        |                |             |
|                |            |      | GA/AA              | 488/477                 | 1.01 (0.78-1.33)       | 0.92           |         | 578/704                | 0.88 (0.51-1.52)       | 0.66           |             |
| <i>CYP19A1</i> | rs700519   | 15   | GG                 | 597/592                 | 1.00                   | 0.57           | 0.45    | 428/511                | 1.00                   | 0.56           | 0.40        |
|                |            |      | GA                 | 40/42                   | 0.87 (0.54-1.41)       |                |         | 165/201                | 0.96 (0.74-1.23)       |                |             |
|                |            |      | AA                 | 1/1                     | 0.09 (0-15.88)         |                |         | 13/24                  | 0.68 (0.33-1.39)       |                |             |
|                |            |      | GA/AA              | 41/43                   | 0.85 (0.53-1.37)       | 0.51           |         | 178/225                | 0.93 (0.73-1.19)       | 0.55           |             |
| <i>CYP19A1</i> | rs727479   | 15   | AA                 | 262/272                 | 1.00                   | 0.25           | 0.80    | 388/460                | 1.00                   | 0.48           | 0.96        |
|                |            |      | AC                 | 309/283                 | 1.13 (0.89-1.45)       |                |         | 187/245                | 0.91 (0.71-1.16)       |                |             |
|                |            |      | CC                 | 67/80                   | 0.83 (0.56-1.22)       |                |         | 31/31                  | 1.25 (0.73-2.15)       |                |             |
|                |            |      | AC/CC              | 376/363                 | 1.07 (0.84-1.35)       | 0.60           |         | 218/276                | 0.95 (0.75-1.19)       | 0.64           |             |
| <i>CYP19A1</i> | rs749292   | 15   | GG                 | 176/182                 | 1.00                   | 0.72           | 0.59    | 179/200                | 1.00                   | 0.44           | 0.46        |
|                |            |      | GA                 | 335/324                 | 1.12 (0.85-1.47)       |                |         | 286/362                | 0.84 (0.65-1.1)        |                |             |
|                |            |      | AA                 | 126/130                 | 1.08 (0.77-1.52)       |                |         | 139/174                | 0.9 (0.66-1.23)        |                |             |
|                |            |      | GA/AA              | 461/454                 | 1.11 (0.86-1.44)       | 0.43           |         | 425/536                | 0.86 (0.67-1.1)        | 0.23           |             |
| <i>CYP11A1</i> | rs1378942  | 15   | AA                 | 229/240                 | 1.00                   | 0.68           | 0.53    | 9/11                   | 1.00                   | 0.30           | 0.12        |
|                |            |      | AC                 | 309/317                 | 1 (0.78-1.29)          |                |         | 110/115                | 0.89 (0.34-2.34)       |                |             |
|                |            |      | CC                 | 100/77                  | 1.17 (0.8-1.69)        |                |         | 486/610                | 0.7 (0.27-1.84)        |                |             |
|                |            |      | AC/CC              | 409/394                 | 1.03 (0.81-1.31)       | 0.80           |         | 596/725                | 0.77 (0.3-1.99)        | 0.59           |             |
| <i>CYP11A1</i> | rs1799814  | 15   | CC                 | 555/554                 | 1.00                   | 0.88           | 0.73    | 597/727                | 1.00                   | 0.96           | N/A         |
|                |            |      | CA                 | 68/72                   | 0.99 (0.68-1.43)       |                |         | 6/8                    | 0.97 (0.32-2.93)       |                |             |
|                |            |      | AA                 | 9/9                     | 0.77 (0.28-2.11)       |                |         | 0/0                    | N/A                    |                |             |
|                |            |      | CA/AA              | 77/81                   | 0.96 (0.68-1.36)       | 0.82           |         | 6/8                    | 0.97 (0.32-2.93)       | 0.96           |             |
| <i>CYP11A2</i> | rs2470893  | 15   | GG                 | 360/350                 | 1.00                   | 0.47           | 0.63    | 535/668                | 1.00                   | 0.13           | <b>0.05</b> |
|                |            |      | GA                 | 245/244                 | 1.04 (0.82-1.33)       |                |         | 64/64                  | 1.37 (0.93-2.01)       |                |             |
|                |            |      | AA                 | 33/42                   | 0.76 (0.46-1.25)       |                |         | 5/3                    | 2.78 (0.60-12.80)      |                |             |
|                |            |      | GA/AA              | 278/286                 | 1.00 (0.79-1.26)       | 0.99           |         | 69/67                  | 1.42 (0.97-2.07)       | 0.07           |             |
| <i>CYP11A2</i> | rs2472297  | 15   | GG                 | 443/444                 | 1.00                   | 0.99           | 0.89    | 553/680                | 1.00                   | 0.48           | 0.25        |
|                |            |      | GA                 | 173/173                 | 1.01 (0.78-1.31)       |                |         | 50/54                  | 1.21 (0.8-1.85)        |                |             |

|               |           |    |       |         |                  |        |                |         |                  |      |      |
|---------------|-----------|----|-------|---------|------------------|--------|----------------|---------|------------------|------|------|
|               |           |    | AA    | 19/18   | 1.06 (0.53-2.09) |        |                | 3/2     | 2.29 (0.35-15.2) |      |      |
|               |           |    | GA/AA | 192/191 | 1.01 (0.79-1.31) | 0.91   |                | 53/56   | 1.24 (0.82-1.88) | 0.30 |      |
| <i>CYP1A2</i> | rs2472304 | 15 | AA    | 218/228 | 1.00             | 0.83   | 0.79           | 10/11   | 1.00             | 0.54 | 0.27 |
|               |           |    | AG    | 312/318 | 0.97 (0.75-1.25) |        |                | 115/130 | 0.78 (0.3-2.02)  |      |      |
|               |           |    | GG    | 105/85  | 1.08 (0.75-1.56) |        |                | 480/592 | 0.68 (0.27-1.75) |      |      |
|               |           |    | AG/GG | 417/403 | 0.99 (0.78-1.27) | 0.97   |                | 595/722 | 0.72 (0.28-1.82) | 0.49 |      |
| <i>CYP1A2</i> | rs762551  | 15 | AA    | 301/301 | 1.00             | 0.74   | 0.96           | 213/250 | 1.00             | 0.77 | 0.53 |
|               |           |    | AC    | 285/290 | 0.94 (0.73-1.19) |        |                | 284/348 | 0.92 (0.71-1.18) |      |      |
|               |           |    | CC    | 51/44   | 1.1 (0.7-1.73)   |        |                | 109/137 | 0.92 (0.66-1.26) |      |      |
|               |           |    | AC/CC | 336/334 | 0.96 (0.76-1.21) | 0.72   |                | 393/485 | 0.92 (0.72-1.16) | 0.47 |      |
| <i>CYP1B1</i> | rs1056836 | 2  | GG    | 192/191 | 1.00             | 0.72   | 0.42           | 37/39   | 1.00             | 0.61 | 0.96 |
|               |           |    | GC    | 324/329 | 1.08 (0.83-1.41) |        |                | 217/284 | 0.79 (0.48-1.3)  |      |      |
|               |           |    | CC    | 120/115 | 1.15 (0.81-1.62) |        |                | 352/413 | 0.84 (0.51-1.38) |      |      |
|               |           |    | GC/CC | 444/444 | 1.1 (0.85-1.42)  | 0.47   |                | 569/697 | 0.82 (0.5-1.33)  | 0.41 |      |
| <i>CYP1B1</i> | rs1800440 | 2  | AA    | 427/439 | 1.00             | 0.88   | 0.71           | 562/691 | 1.00             | 0.30 | N/A  |
|               |           |    | AG    | 187/173 | 1.07 (0.82-1.38) |        |                | 44/37   | 1.45 (0.9-2.34)  |      |      |
|               |           |    | GG    | 24/20   | 1 (0.52-1.9)     |        |                | 0/4     | N/A              |      |      |
|               |           |    | AG/GG | 211/193 | 1.06 (0.83-1.36) | 0.64   |                | 44/41   | 1.31 (0.82-2.08) | 0.26 |      |
| <i>CYP2C9</i> | rs1057910 | 10 | AA    | 542/532 | 1.00             | 0.60   | 0.84           | 578/708 | 1.00             | 0.72 | N/A  |
|               |           |    | AC    | 85/93   | 0.90 (0.65-1.26) |        |                | 20/19   | 1.32 (0.68-2.57) |      |      |
|               |           |    | CC    | 5/4     | 1.74 (0.44-6.85) |        |                | 1/0     | N/A              |      |      |
|               |           |    | AC/CC | 90/97   | 0.93 (0.67-1.29) | 0.68   |                | 21/19   | 1.39 (0.72-2.68) | 0.33 |      |
| <i>CYP3A4</i> | rs4987161 | 7  | AA    | 624/627 | 1.00             | 0.52   | N/A            | 595/734 | 1.00             | 0.97 | N/A  |
|               |           |    | AG    | 13/7    | 1.76 (0.67-4.63) |        |                | 10/0    | N/A              |      |      |
|               |           |    | GG    | 0/1     | N/A              |        |                | 0/0     | N/A              |      |      |
|               |           |    | AG/GG | 13/8    | 1.55 (0.61-3.92) | 0.36   |                | 10/0    | N/A              | N/A  |      |
| <i>CYP3A5</i> | rs776746  | 7  | GG    | 539/541 | 1.00             | 0.52   | 0.31           | 54/79   | 1.00             | 0.58 | 0.77 |
|               |           |    | GA    | 94/91   | 0.87 (0.62-1.22) |        |                | 261/298 | 1.23 (0.82-1.85) |      |      |
|               |           |    | AA    | 5/3     | 0.46 (0.08-2.75) |        |                | 290/359 | 1.17 (0.78-1.76) |      |      |
|               |           |    | GA/AA | 99/94   | 0.86 (0.62-1.19) | 0.36   |                | 551/657 | 1.2 (0.82-1.77)  | 0.35 |      |
| <i>CYP3A7</i> | rs2257401 | 7  | GG    | 517/526 | 1.00             | 0.31   | 0.48           | 115/160 | 1.00             | 0.53 | 0.35 |
|               |           |    | GC    | 113/103 | 0.98 (0.72-1.34) |        |                | 315/375 | 1.17 (0.87-1.58) |      |      |
|               |           |    | CC    | 5/6     | 0.33 (0.08-1.36) |        |                | 165/194 | 1.19 (0.85-1.66) |      |      |
|               |           |    | GC/CC | 118/109 | 0.94 (0.69-1.28) | 0.69   |                | 480/569 | 1.18 (0.89-1.56) | 0.26 |      |
| <i>ESR1</i>   | rs1801132 | 6  | GG    | 373/433 | 1.00             | 0.0006 | <b>0.0002</b>  | 469/575 | 1.00             | 0.89 | 0.63 |
|               |           |    | GC    | 217/185 | 1.34 (1.04-1.73) |        |                | 129/153 | 1.06 (0.8-1.4)   |      |      |
|               |           |    | CC    | 45/18   | 2.74 (1.53-4.92) |        |                | 7/6     | 1.19 (0.38-3.74) |      |      |
|               |           |    | GC/CC | 262/203 | 1.47 (1.16-1.87) | 0.002  |                | 136/159 | 1.07 (0.81-1.4)  | 0.65 |      |
| <i>ESR1</i>   | rs2046210 | 6  | GG    | 237/256 | 1.00             | 0.007  | <b>0.02</b>    | 84/109  | 1.00             | 0.45 | 0.54 |
|               |           |    | GA    | 293/310 | 1.02 (0.79-1.31) |        |                | 283/316 | 1.13 (0.8-1.58)  |      |      |
|               |           |    | AA    | 107/70  | 1.75 (1.21-2.54) |        |                | 238/309 | 0.97 (0.68-1.37) |      |      |
|               |           |    | GA/AA | 400/380 | 1.14 (0.9-1.45)  | 0.27   |                | 521/625 | 1.05 (0.76-1.45) | 0.77 |      |
| <i>ESR1</i>   | rs2228480 | 6  | GG    | 437/444 | 1.00             | 0.51   | 0.78           | 415/515 | 1.00             | 0.85 | 0.57 |
|               |           |    | GA    | 179/165 | 1.05 (0.81-1.36) |        |                | 164/193 | 1.06 (0.82-1.37) |      |      |
|               |           |    | AA    | 12/18   | 0.65 (0.3-1.42)  |        |                | 16/17   | 1.16 (0.56-2.38) |      |      |
|               |           |    | GA/AA | 191/183 | 1.01 (0.78-1.3)  | 0.95   |                | 180/210 | 1.07 (0.84-1.37) | 0.60 |      |
| <i>ESR1</i>   | rs2234693 | 6  | AA    | 192/185 | 1.00             | 0.68   | 0.74           | 139/168 | 1.00             | 0.20 | 0.29 |
|               |           |    | AG    | 318/331 | 0.94 (0.72-1.23) |        |                | 315/355 | 1.09 (0.82-1.44) |      |      |
|               |           |    | GG    | 128/119 | 1.08 (0.77-1.52) |        |                | 151/212 | 0.85 (0.62-1.17) |      |      |
|               |           |    | AG/GG | 446/450 | 0.98 (0.76-1.26) | 0.87   |                | 466/567 | 1.00 (0.77-1.31) | 0.99 |      |
| <i>ESR1</i>   | rs3020314 | 6  | AA    | 261/331 | 1.00             | 0.0004 | <b>0.00009</b> | 54/58   | 1.00             | 0.63 | 0.51 |
|               |           |    | AG    | 291/254 | 1.47 (1.15-1.88) |        |                | 243/297 | 0.82 (0.53-1.26) |      |      |
|               |           |    | GG    | 86/51   | 1.95 (1.3-2.94)  |        |                | 309/381 | 0.82 (0.53-1.25) |      |      |
|               |           |    | AG/GG | 377/305 | 1.55 (1.23-1.96) | 0.0002 |                | 552/678 | 0.82 (0.54-1.24) | 0.34 |      |
| <i>ESR1</i>   | rs3798577 | 6  | AA    | 185/196 | 1.00             | 0.57   | 0.79           | 207/247 | 1.00             | 0.73 | 0.92 |
|               |           |    | AG    | 332/309 | 1.09 (0.83-1.43) |        |                | 272/343 | 0.91 (0.71-1.18) |      |      |
|               |           |    | GG    | 118/130 | 0.93 (0.67-1.3)  |        |                | 126/144 | 1.01 (0.73-1.38) |      |      |
|               |           |    | AG/GG | 450/439 | 1.04 (0.81-1.34) | 0.75   |                | 398/487 | 0.94 (0.74-1.19) | 0.62 |      |
| <i>ESR1</i>   | rs9383938 | 6  | CC    | 512/519 | 1.00             | 0.67   | 0.59           | 432/515 | 1.00             | 0.93 | 0.91 |
|               |           |    | CA    | 119/111 | 1.13 (0.83-1.52) |        |                | 161/205 | 0.96 (0.75-1.24) |      |      |
|               |           |    | AA    | 5/6     | 0.77 (0.22-2.73) |        |                | 13/15   | 1.1 (0.5-2.41)   |      |      |
|               |           |    | CA/AA | 124/117 | 1.11 (0.82-1.49) | 0.50   |                | 174/220 | 0.97 (0.76-1.24) | 0.83 |      |
| <i>ESR1</i>   | rs9397435 | 6  | AA    | 523/541 | 1.00             | 0.29   | 0.12           | 500/604 | 1.00             | 0.30 | 0.62 |
|               |           |    | AG    | 109/90  | 1.28 (0.93-1.76) |        |                | 104/125 | 1.01 (0.75-1.36) |      |      |
|               |           |    | GG    | 6/5     | 1.39 (0.41-4.71) |        |                | 2/7     | 0.27 (0.05-1.43) |      |      |
|               |           |    | AG/GG | 115/95  | 1.29 (0.94-1.76) | 0.12   |                | 106/132 | 0.97 (0.73-1.3)  | 0.85 |      |
| <i>ESR2</i>   | rs1255998 | 14 | CC    | 478/503 | 1.00             | 0.49   | 0.43           | 123/154 | 1.00             | 0.89 | 0.66 |
|               |           |    | CG    | 148/125 | 1.17 (0.88-1.55) |        |                | 301/377 | 1.06 (0.79-1.42) |      |      |
|               |           |    | GG    | 11/7    | 0.78 (0.25-2.43) |        |                | 177/204 | 1.08 (0.78-1.5)  |      |      |
|               |           |    | CG/GG | 159/132 | 1.15 (0.87-1.52) | 0.33   |                | 478/581 | 1.07 (0.81-1.41) | 0.65 |      |
| <i>ESR2</i>   | rs1256049 | 14 | GG    | 601/598 | 1.00             | 0.68   | N/A            | 495/595 | 1.00             | 0.55 | 0.47 |
|               |           |    | GA    | 36/35   | 0.79 (0.47-1.33) |        |                | 106/129 | 0.96 (0.72-1.29) |      |      |
|               |           |    | AA    | 0/1     | N/A              |        |                | 4/11    | 0.52 (0.16-1.7)  |      |      |

|         |            |    |       |         |                  |      |      |         |                  |      |      |
|---------|------------|----|-------|---------|------------------|------|------|---------|------------------|------|------|
| ESR2    | rs1256065  | 14 | GA/AA | 36/36   | 0.77 (0.46-1.28) | 0.31 |      | 110/140 | 0.93 (0.7-1.24)  | 0.62 |      |
|         |            |    | AA    | 222/227 | 1.00             | 0.85 | 0.93 | 475/573 | 1.00             | 0.56 | 0.93 |
|         |            |    | AC    | 301/291 | 1.07 (0.82-1.38) |      |      | 125/150 | 1.06 (0.8-1.41)  |      |      |
|         |            |    | CC    | 115/118 | 0.99 (0.71-1.39) |      |      | 6/12    | 0.61 (0.22-1.67) |      |      |
| ESR2    | rs2987983  | 14 | AC/CC | 416/409 | 1.05 (0.82-1.33) | 0.71 |      | 131/162 | 1.03 (0.78-1.36) | 0.85 |      |
|         |            |    | AA    | 271/275 | 1.00             | 0.27 | 0.29 | 98/130  | 1.00             | 0.52 | 0.25 |
|         |            |    | AG    | 273/285 | 0.98 (0.76-1.26) |      |      | 280/351 | 1.1 (0.8-1.52)   |      |      |
|         |            |    | GG    | 92/75   | 1.31 (0.91-1.9)  |      |      | 227/255 | 1.21 (0.87-1.69) |      |      |
| ESR2    | rs3020450  | 14 | AG/GG | 365/360 | 1.05 (0.83-1.32) | 0.70 |      | 507/606 | 1.15 (0.85-1.55) | 0.37 |      |
|         |            |    | GG    | 271/265 | 1.00             | 0.20 | 0.33 | 213/249 | 1.00             | 0.97 | 0.79 |
|         |            |    | GA    | 277/298 | 0.95 (0.74-1.21) |      |      | 286/356 | 0.98 (0.76-1.26) |      |      |
|         |            |    | AA    | 89/73   | 1.32 (0.91-1.92) |      |      | 107/129 | 0.96 (0.69-1.33) |      |      |
| HSD17B2 | rs4445895  | 16 | GA/AA | 366/371 | 1.02 (0.81-1.29) | 0.87 |      | 393/485 | 0.97 (0.77-1.23) | 0.82 |      |
|         |            |    | GG    | 230/221 | 1.00             | 0.83 | 0.80 | 268/352 | 1.00             | 0.37 | 0.21 |
|         |            |    | GA    | 301/309 | 0.92 (0.71-1.2)  |      |      | 273/308 | 1.18 (0.93-1.49) |      |      |
|         |            |    | AA    | 106/106 | 0.98 (0.7-1.38)  |      |      | 65/75   | 1.17 (0.8-1.72)  |      |      |
| PR      | rs1042838  | 11 | GA/AA | 407/415 | 0.94 (0.74-1.2)  | 0.61 |      | 338/383 | 1.18 (0.94-1.47) | 0.16 |      |
|         |            |    | CC    | 448/435 | 1.00             | 0.80 | 0.78 | 568/678 | 1.00             | 0.45 | N/A  |
|         |            |    | CA    | 163/177 | 0.93 (0.71-1.21) |      |      | 31/49   | 0.72 (0.44-1.2)  |      |      |
|         |            |    | AA    | 19/17   | 1.12 (0.55-2.28) |      |      | 2/0     | N/A              |      |      |
| SRD5A1  | rs3736316  | 5  | CA/AA | 182/194 | 0.94 (0.73-1.22) | 0.65 |      | 33/49   | 0.77 (0.47-1.26) | 0.30 |      |
|         |            |    | GG    | 227/222 | 1.00             | 0.94 | 0.75 | 272/342 | 1.00             | 0.34 | 0.17 |
|         |            |    | GA    | 305/299 | 0.99 (0.76-1.27) |      |      | 265/324 | 1.08 (0.85-1.37) |      |      |
|         |            |    | AA    | 106/114 | 0.94 (0.67-1.33) |      |      | 68/70   | 1.33 (0.9-1.95)  |      |      |
| SRD5A1  | rs3822430  | 5  | GA/AA | 411/413 | 0.97 (0.76-1.24) | 0.83 |      | 333/394 | 1.13 (0.9-1.41)  | 0.30 |      |
|         |            |    | AA    | 232/223 | 1.00             | 0.87 | 0.60 | 273/343 | 1.00             | 0.32 | 0.16 |
|         |            |    | AG    | 299/296 | 0.95 (0.74-1.23) |      |      | 262/323 | 1.07 (0.85-1.36) |      |      |
|         |            |    | GG    | 107/116 | 0.92 (0.65-1.29) |      |      | 68/69   | 1.35 (0.92-1.98) |      |      |
| SRD5A2  | rs523349   | 2  | AG/GG | 406/412 | 0.94 (0.74-1.2)  | 0.63 |      | 330/392 | 1.12 (0.9-1.4)   | 0.32 |      |
|         |            |    | CC    | 318/312 | 1.00             | 0.49 | 0.54 | 340/370 | 1.00             | 0.13 | 0.06 |
|         |            |    | CG    | 263/257 | 1.03 (0.81-1.32) |      |      | 226/308 | 0.79 (0.63-1.00) |      |      |
|         |            |    | GG    | 57/65   | 0.8 (0.53-1.21)  |      |      | 40/58   | 0.79 (0.51-1.24) |      |      |
| UGT1A1  | rs10929302 | 2  | CG/GG | 320/322 | 0.99 (0.78-1.24) | 0.90 |      | 266/366 | 0.79 (0.63-0.99) | 0.04 |      |
|         |            |    | GG    | 312/291 | 1.00             | 0.46 | 0.22 | 307/368 | 1.00             | 0.71 | 0.76 |
|         |            |    | GA    | 268/278 | 0.9 (0.71-1.16)  |      |      | 253/300 | 1.03 (0.82-1.31) |      |      |
|         |            |    | AA    | 58/67   | 0.79 (0.53-1.18) |      |      | 44/65   | 0.86 (0.56-1.32) |      |      |
| UGT1A1  | rs4124874  | 2  | GA/AA | 326/345 | 0.88 (0.7-1.11)  | 0.29 |      | 297/365 | 1 (0.8-1.26)     | 0.97 |      |
|         |            |    | AA    | 177/184 | 1.00             | 0.61 | 0.92 | 20/20   | 1.00             | 0.10 | 0.12 |
|         |            |    | AC    | 309/294 | 1.13 (0.86-1.49) |      |      | 163/241 | 0.73 (0.37-1.45) |      |      |
|         |            |    | CC    | 152/158 | 1.01 (0.73-1.39) |      |      | 422/474 | 0.96 (0.49-1.88) |      |      |
| UGT1A6  | rs2070959  | 2  | AC/CC | 461/452 | 1.09 (0.84-1.4)  | 0.53 |      | 585/715 | 0.86 (0.44-1.68) | 0.67 |      |
|         |            |    | AA    | 287/256 | 1.00             | 0.20 | 0.56 | 342/443 | 1.00             | 0.02 | 0.45 |
|         |            |    | AG    | 274/306 | 0.82 (0.64-1.05) |      |      | 235/243 | 1.32 (1.04-1.67) |      |      |
|         |            |    | GG    | 77/71   | 1.03 (0.71-1.51) |      |      | 26/49   | 0.73 (0.44-1.22) |      |      |
| UGT1A9  | rs6714486  | 2  | AG/GG | 351/377 | 0.86 (0.68-1.08) | 0.20 |      | 261/292 | 1.22 (0.97-1.53) | 0.09 |      |
|         |            |    | TT    | 558/567 | 1.00             | 0.40 | 0.27 | 439/513 | 1.00             | 0.23 | 0.11 |
|         |            |    | TA    | 70/60   | 1.29 (0.87-1.89) |      |      | 148/187 | 0.87 (0.67-1.14) |      |      |
|         |            |    | AA    | 1/2     | 0.6 (0.05-7.15)  |      |      | 16/26   | 0.6 (0.3-1.18)   |      |      |
| UGT2B15 | rs1902023  | 4  | TA/AA | 71/62   | 1.26 (0.86-1.85) | 0.23 |      | 164/213 | 0.84 (0.65-1.08) | 0.18 |      |
|         |            |    | AA    | 169/166 | 1.00             | 0.12 | 0.08 | 91/142  | 1.00             | 0.05 | 0.38 |
|         |            |    | AC    | 341/322 | 0.97 (0.74-1.28) |      |      | 321/354 | 1.48 (1.08-2.03) |      |      |
|         |            |    | CC    | 124/147 | 0.73 (0.52-1.02) |      |      | 193/240 | 1.27 (0.90-1.77) |      |      |
|         |            |    | AC/CC | 465/469 | 0.89 (0.69-1.16) | 0.40 |      | 514/594 | 1.39 (1.03-1.88) | 0.03 |      |

Abbreviations: OR, odds ratio; 95%CI, 95% confidence interval; p-trend, p value for linear trend before correction for multiple testing.

a. Adjusted for age at diagnosis (continuous), education (less than high school, high school, college and graduate school), family history of breast cancer (yes, no), history of benign breast disease (yes, no), menopausal status (premenopausal, postmenopausal), number of full pregnancy (continuous), breast feeding (yes, no, nulliparous), Hormone Replacement Therapy (HRT, yes, no), body mass index (continuous), proportion of European ancestry (continuous) and estrogen months (continuous).

b. P, p value calculated using a genotypic (codominant) model.

c. OR, 95%CI and corresponding p values were also calculated for each SNP after heterozygotes and rare homozygotes (dominant model) to account for the low number of rare homozygotes for certain SNPs.
