# Supplementary material
Source: PubMed Central journal article supplement (PMC4214251)
Supplement: NIHMS635292-supplement-4.pdf [file NIHMS635292-supplement-4.pdf]

Supplementary Table 3. ORs and 95% CIs of all SNPs among European American (EA) and African American (AA) women by ER status in WCHS.

| Gene    | SNP        | Chr. | Genotype           | European American |                        |                |         |             |                        |                |             | African American |                        |                |         |             |                        |                |         |
|---------|------------|------|--------------------|-------------------|------------------------|----------------|---------|-------------|------------------------|----------------|-------------|------------------|------------------------|----------------|---------|-------------|------------------------|----------------|---------|
|         |            |      |                    | ER Positive       |                        |                |         | ER Negative |                        |                |             | ER Positive      |                        |                |         | ER Negative |                        |                |         |
|         |            |      |                    | Ca/Co             | OR(95%CI) <sup>a</sup> | P <sup>b</sup> | P-trend | Ca/Co       | OR(95%CI) <sup>a</sup> | P <sup>b</sup> | P-trend     | Ca/Co            | OR(95%CI) <sup>a</sup> | P <sup>b</sup> | P-trend | Ca/Co       | OR(95%CI) <sup>a</sup> | P <sup>b</sup> | P-trend |
| COMT    | rs4633     | 22   | GG                 | 89/165            | 1.00                   | 0.86           | 0.82    | 25/165      | 1.00                   | 0.35           | 0.15        | 32/76            | 1.00                   | 0.84           | 0.95    | 6/76        | 1.00                   | 0.07           | 0.15    |
|         |            |      | GA                 | 187/304           | 1.10 (0.79-1.53)       |                |         | 38/304      | 0.77 (0.43-1.36)       |                |             | 137/313          | 1.13 (0.7-1.83)        |                |         | 68/313      | 2.87 (1.18-7.00)       |                |         |
|         |            |      | AA                 | 99/167            | 1.05 (0.72-1.53)       |                |         | 16/167      | 0.60 (0.30-1.21)       |                |             | 145/344          | 1.06 (0.66-1.7)        |                |         | 72/344      | 2.72 (1.12-6.62)       |                |         |
|         |            |      | GA/AA <sup>c</sup> | 286/471           | 1.08 (0.79-1.48)       | 0.63           |         | 54/471      | 0.71 (0.42-1.21)       | 0.21           |             | 282/657          | 1.09 (0.69-1.72)       | 0.71           |         | 140/657     | 2.79 (1.17-6.66)       | 0.02           |         |
| CYP17A1 | rs10883782 | 10   | AA                 | 250/414           | 1.00                   | 0.76           | 0.77    | 53/414      | 1.00                   | 0.84           | 0.57        | 239/588          | 1.00                   | 0.14           | 0.25    | 118/588     | 1.00                   | 0.93           | 0.73    |
|         |            |      | AG                 | 114/192           | 1.02 (0.76-1.38)       |                |         | 22/192      | 0.86 (0.49-1.5)        |                |             | 71/135           | 1.36 (0.97-1.9)        |                |         | 25/135      | 0.91 (0.56-1.48)       |                |         |
|         |            |      | GG                 | 12/26             | 0.77 (0.37-1.61)       |                |         | 3/26        | 0.81 (0.22-2.99)       |                |             | 3/10             | 0.58 (0.16-2.21)       |                |         | 2/10        | 0.96 (0.2-4.57)        |                |         |
|         |            |      | AG/GG              | 126/218           | 0.99 (0.75-1.32)       | 0.96           |         | 25/218      | 0.85 (0.50-1.45)       | 0.56           |             | 74/145           | 1.29 (0.93-1.8)        | 0.13           |         | 27/145      | 0.91 (0.57-1.46)       | 0.70           |         |
| CYP17A1 | rs12413409 | 10   | GG                 | 306/519           | 1.00                   | 0.57           | 0.83    | 56/519      | 1.00                   | <b>0.04</b>    | <b>0.01</b> | 282/659          | 1.00                   | 1.00           | N/A     | 133/659     | 1.00                   | 0.95           | N/A     |
|         |            |      | GA                 | 63/109            | 0.95 (0.66-1.36)       |                |         | 22/109      | 2.01 (1.15-3.54)       |                |             | 32/74            | 1.01 (0.64-1.60)       |                |         | 13/74       | 0.90 (0.48-1.71)       |                |         |
|         |            |      | AA                 | 6/6               | 1.89 (0.54-6.61)       |                |         | 1/6         | 2.55 (0.28-23.31)      |                |             | 0/1              | N/A                    |                |         | 0/1         | N/A                    |                |         |
|         |            |      | GA/AA              | 69/115            | 0.99 (0.70-1.41)       | 0.96           |         | 23/115      | 2.03 (1.17-3.55)       | <b>0.01</b>    |             | 32/75            | 1.00 (0.63-1.58)       | 1.00           |         | 13/75       | 0.89 (0.47-1.69)       | 0.73           |         |
| CYP17A1 | rs2486758  | 10   | AA                 | 219/405           | 1.00                   | 0.19           | 0.07    | 54/405      | 1.00                   | 0.72           | 0.60        | 276/640          | 1.00                   | 0.85           | N/A     | 133/640     | 1.00                   | 0.95           | N/A     |
|         |            |      | AG                 | 136/207           | 1.25 (0.94-1.67)       |                |         | 23/207      | 0.99 (0.57-1.7)        |                |             | 39/88            | 1.13 (0.74-1.73)       |                |         | 14/88       | 0.90 (0.48-1.69)       |                |         |
|         |            |      | GG                 | 22/24             | 1.50 (0.79-2.84)       |                |         | 2/24        | 0.53 (0.12-2.46)       |                |             | 0/8              | N/A                    |                |         | 0/8         | N/A                    |                |         |
|         |            |      | AG/GG              | 158/231           | 1.28 (0.97-1.69)       | 0.08           |         | 25/231      | 0.93 (0.55-1.57)       | 0.78           |             | 39/96            | 1.03 (0.68-1.57)       | 0.88           |         | 14/96       | 0.8 (0.43-1.5)         | 0.49           |         |
| CYP17A1 | rs6162     | 10   | GG                 | 143/207           | 1.00                   | 0.23           | 0.09    | 22/207      | 1.00                   | 0.45           | 0.48        | 113/306          | 1.00                   | 0.09           | 0.45    | 55/306      | 1.00                   | 0.46           | 0.40    |
|         |            |      | GA                 | 172/311           | 0.82 (0.61-1.11)       |                |         | 43/311      | 1.45 (0.81-2.59)       |                |             | 159/320          | 1.43 (1.06-1.94)       |                |         | 70/320      | 1.29 (0.86-1.94)       |                |         |
|         |            |      | AA                 | 61/116            | 0.72 (0.48-1.08)       |                |         | 14/116      | 1.25 (0.59-2.64)       |                |             | 43/109           | 0.94 (0.63-1.51)       |                |         | 22/109      | 1.15 (0.66-2.03)       |                |         |
|         |            |      | GA/AA              | 233/427           | 0.80 (0.60-1.06)       | 0.11           |         | 57/427      | 1.40 (0.80-2.43)       | 0.24           |             | 202/429          | 1.31 (0.99-1.75)       | 0.07           |         | 92/429      | 1.26 (0.86-1.84)       | 0.24           |         |
| CYP17A1 | rs619824   | 10   | CC                 | 132/205           | 1.00                   | 0.52           | 0.25    | 21/205      | 1.00                   | 0.31           | 0.71        | 40/99            | 1.00                   | 0.62           | 0.74    | 19/99       | 1.00                   | 0.85           | 0.64    |
|         |            |      | CA                 | 175/304           | 0.89 (0.66-1.21)       |                |         | 44/304      | 1.51 (0.84-2.71)       |                |             | 150/338          | 1.15 (0.75-1.77)       |                |         | 62/338      | 0.98 (0.55-1.75)       |                |         |
|         |            |      | AA                 | 70/126            | 0.8 (0.54-1.18)        |                |         | 14/126      | 1.06 (0.50-2.25)       |                |             | 125/298          | 1.01 (0.65-1.56)       |                |         | 66/298      | 1.10 (0.61-1.96)       |                |         |
|         |            |      | CA/AA              | 245/430           | 0.86 (0.65-1.15)       | 0.32           |         | 58/430      | 1.37 (0.78-2.39)       | 0.27           |             | 275/636          | 1.08 (0.72-1.63)       | 0.70           |         | 128/636     | 1.04 (0.6-1.79)        | 0.90           |         |
| CYP19A1 | rs10046    | 15   | AA                 | 115/179           | 1.00                   | 0.29           | 0.12    | 15/179      | 1.00                   | 0.55           | 0.38        | 21/44            | 1.00                   | 0.85           | 0.80    | 12/44       | 1.00                   | 0.07           | 0.40    |
|         |            |      | AG                 | 190/320           | 0.87 (0.64-1.19)       |                |         | 43/320      | 1.41 (0.74-2.67)       |                |             | 121/271          | 0.85 (0.47-1.52)       |                |         | 41/271      | 0.46 (0.22-0.97)       |                |         |
|         |            |      | GG                 | 72/137            | 0.73 (0.49-1.08)       |                |         | 21/137      | 1.4 (0.67-2.94)        |                |             | 173/420          | 0.86 (0.49-1.52)       |                |         | 93/420      | 0.73 (0.36-1.48)       |                |         |
|         |            |      | AG/GG              | 262/457           | 0.83 (0.62-1.11)       | 0.21           |         | 64/457      | 1.41 (0.76-2.6)        | 0.28           |             | 294/691          | 0.85 (0.49-1.49)       | 0.58           |         | 134/691     | 0.62 (0.31-1.24)       | 0.18           |         |
| CYP19A1 | rs11575899 | 15   | II                 | 171/274           | 1.00                   | 0.07           | 0.09    | 27/274      | 1.00                   | 0.56           | 0.59        | 145/332          | 1.00                   | 1.00           | 1.00    | 70/332      | 1.00                   | 0.67           | 0.93    |
|         |            |      | ID                 | 175/284           | 0.99 (0.74-1.32)       |                |         | 41/284      | 1.34 (0.78-2.29)       |                |             | 132/316          | 0.99 (0.74-1.33)       |                |         | 56/316      | 0.89 (0.6-1.32)        |                |         |
|         |            |      | DD                 | 30/78             | 0.57 (0.35-0.93)       |                |         | 11/78       | 1.07 (0.48-2.39)       |                |             | 36/86            | 1.01 (0.64-1.59)       |                |         | 20/86       | 1.14 (0.64-2.02)       |                |         |
|         |            |      | ID/DD              | 205/362           | 0.90 (0.68-1.18)       | 0.43           |         | 52/362      | 1.27 (0.76-2.14)       | 0.36           |             | 168/402          | 0.99 (0.75-1.31)       | 0.97           |         | 76/402      | 0.94 (0.65-1.36)       | 0.75           |         |
| CYP19A1 | rs2445765  | 15   | CC                 | 260/428           | 1.00                   | 0.25           | 0.18    | 52/428      | 1.00                   | 0.58           | 0.88        | 179/407          | 1.00                   | 0.32           | 0.35    | 90/407      | 1.00                   | 0.35           | 0.18    |
|         |            |      | CG                 | 111/185           | 0.91 (0.68-1.23)       |                |         | 23/185      | 0.81 (0.45-1.44)       |                |             | 123/275          | 1 (0.75-1.33)          |                |         | 48/275      | 0.76 (0.51-1.13)       |                |         |
|         |            |      | GG                 | 6/23              | 0.45 (0.17-1.18)       |                |         | 4/23        | 1.45 (0.46-4.63)       |                |             | 13/53            | 0.6 (0.31-1.17)        |                |         | 9/53        | 0.75 (0.34-1.63)       |                |         |
|         |            |      | CG/GG              | 117/208           | 0.87 (0.65-1.16)       | 0.34           |         | 27/208      | 0.87 (0.51-1.50)       | 0.62           |             | 136/328          | 0.94 (0.71-1.25)       | 0.68           |         | 57/328      | 0.76 (0.52-1.1)        | 0.15           |         |
| CYP19A1 | rs4775936  | 15   | GG                 | 88/175            | 1.00                   | 0.16           | 0.10    | 23/175      | 1.00                   | 0.66           | 0.90        | 225/538          | 1.00                   | 0.95           | 0.86    | 113/538     | 1.00                   | 0.34           | 0.57    |
|         |            |      | GA                 | 202/321           | 1.35 (0.97-1.89)       |                |         | 43/321      | 1.20 (0.68-2.13)       |                |             | 81/177           | 1.05 (0.76-1.45)       |                |         | 29/177      | 0.75 (0.47-1.19)       |                |         |
|         |            |      | AA                 | 85/139            | 1.38 (0.93-2.06)       |                |         | 13/139      | 0.90 (0.42-1.93)       |                |             | 8/21             | 0.96 (0.41-2.27)       |                |         | 5/21        | 1.45 (0.51-4.16)       |                |         |
|         |            |      | GA/AA              | 287/460           | 1.36 (0.99-1.87)       | 0.06           |         | 56/460      | 1.12 (0.64-1.94)       | 0.70           |             | 89/198           | 1.04 (0.76-1.42)       | 0.81           |         | 34/198      | 0.81 (0.52-1.25)       | 0.34           |         |
| CYP19A1 | rs700518   | 15   | GG                 | 94/159            | 1.00                   | 0.39           | 0.25    | 14/159      | 1.00                   | 0.67           | 0.41        | 13/31            | 1.00                   | 0.64           | 0.44    | 7/31        | 1.00                   | 0.32           | 0.46    |
|         |            |      | GA                 | 203/325           | 0.99 (0.71-1.37)       |                |         | 41/325      | 1.3 (0.67-2.52)        |                |             | 112/232          | 1.1 (0.54-2.22)        |                |         | 38/232      | 0.61 (0.24-1.55)       |                |         |
|         |            |      | AA                 | 80/152            | 0.79 (0.53-1.17)       |                |         | 23/152      | 1.38 (0.66-2.89)       |                |             | 190/472          | 0.95 (0.48-1.9)        |                |         | 101/472     | 0.82 (0.34-2)          |                |         |
|         |            |      | GA/AA              | 283/477           | 0.92 (0.68-1.26)       | 0.62           |         | 64/477      | 1.33 (0.7-2.5)         | 0.38           |             | 302/704          | 1.01 (0.51-1.99)       | 0.98           |         | 139/704     | 0.75 (0.31-1.81)       | 0.52           |         |
| CYP19A1 | rs700519   | 15   | GG                 | 352/592           | 1.00                   | 0.71           | 0.72    | 76/592      | 1.00                   | 0.43           | N/A         | 224/511          | 1.00                   | 0.43           | 0.37    | 104/511     | 1.00                   | 0.88           | 0.61    |
|         |            |      | GA                 | 24/42             | 0.96 (0.56-1.66)       |                |         | 3/42        | 0.44 (0.13-1.53)       |                |             | 86/201           | 0.96 (0.7-1.31)        |                |         | 39/201      | 0.92 (0.6-1.39)        |                |         |
|         |            |      | AA                 | 1/1               | 0.15 (0-13.97)         |                |         | 0/1         | N/A                    |                |             | 5/24             | 0.51 (0.19-1.41)       |                |         | 4/24        | 0.81 (0.27-2.5)        |                |         |
|         |            |      | GA/AA              | 25/43             | 0.93 (0.54-1.61)       | 0.80           |         | 3/43        | 0.43 (0.12-1.5)        | 0.19           |             | 91/225           | 0.91 (0.67-1.24)       | 0.56           |         | 43/225      | 0.91 (0.61-1.36)       | 0.63           |         |
| CYP19A1 | rs727479   | 15   | AA                 | 169/272           | 1.00                   | 0.09           | 0.16    | 27/272      | 1.00                   | 0.52           | 0.55        | 199/460          | 1.00                   | 0.49           | 0.83    | 97/460      | 1.00                   | 0.75           | 0.47    |
|         |            |      | AC                 | 177/283           | 1.03 (0.77-1.36)       |                |         | 41/283      | 1.36 (0.79-2.33)       |                |             | 98/245           | 0.92 (0.68-1.24)       |                |         | 45/245      | 0.91 (0.61-1.35)       |                |         |
|         |            |      | CC                 | 31/80             | 0.61 (0.37-0.98)       |                |         | 11/80       | 1.10 (0.49-2.43)       |                |             | 18/31            | 1.37 (0.72-2.58)       |                |         | 5/31        | 0.72 (0.26-1.98)       |                |         |

|                |           |    |       |         |                  |              |              |        |                  |      |      |         |                  |                   |              |         |                |                   |      |  |
|----------------|-----------|----|-------|---------|------------------|--------------|--------------|--------|------------------|------|------|---------|------------------|-------------------|--------------|---------|----------------|-------------------|------|--|
|                |           |    | AC/CC | 208/363 | 0.93 (0.71-1.22) | 0.60         |              | 52/363 | 1.30 (0.78-2.18) | 0.32 |      | 116/276 | 0.97 (0.73-1.29) | 0.84              |              | 50/276  | 0.88 (0.6-1.3) | 0.53              |      |  |
| <i>CYP19A1</i> | rs749292  | 15 | GG    | 101/182 | 1.00             | 0.71         | 0.45         | 22/182 | 1.00             | 0.77 | 0.59 | 83/200  | 1.00             | 0.90              | 0.67         | 44/200  | 1.00           | 0.39              | 0.99 |  |
|                |           |    | GA    | 198/324 | 1.13 (0.82-1.55) |              |              | 42/324 | 1.23 (0.69-2.2)  |      |      |         | 163/362          | 0.98 (0.71-1.36)  |              |         | 65/362         | 0.78 (0.51-1.21)  |      |  |
|                |           |    | AA    | 77/130  | 1.15 (0.78-1.71) |              |              | 15/130 | 1.19 (0.57-2.47) |      |      |         | 67/174           | 0.92 (0.62-1.36)  |              |         | 38/174         | 1.03 (0.62-1.69)  |      |  |
|                |           |    | GA/AA | 275/454 | 1.13 (0.84-1.54) | 0.41         |              | 57/454 | 1.22 (0.7-2.12)  | 0.48 |      |         | 230/536          | 0.96 (0.71-1.31)  | 0.80         |         | 103/536        | 0.86 (0.57-1.28)  | 0.45 |  |
| <i>CYP11A1</i> | rs1378942 | 15 | AA    | 141/240 | 1.00             | 0.80         | 0.79         | 32/240 | 1.00             | 0.87 | 0.60 | 6/11    | 1.00             | 0.16              | 0.06         | 2/11    | 1.00           | 0.83              | 0.66 |  |
|                |           |    | AC    | 180/317 | 0.96 (0.72-1.29) |              |              | 37/317 | 0.92 (0.54-1.56) |      |      |         | 61/115           | 0.69 (0.23-2.08)  |              |         | 18/115         | 0.77 (0.15-4.07)  |      |  |
|                |           |    | CC    | 56/77   | 1.11 (0.72-1.71) |              |              | 10/77  | 0.81 (0.35-1.86) |      |      |         | 247/610          | 0.51 (0.17-1.51)  |              |         | 127/610        | 0.92 (0.18-4.57)  |      |  |
|                |           |    | AC/CC | 236/394 | 0.99 (0.75-1.31) | 0.95         |              | 47/394 | 0.89 (0.54-1.49) | 0.67 |      |         | 308/725          | 0.57 (0.2-1.68)   | 0.31         |         | 145/725        | 0.88 (0.18-4.38)  | 0.88 |  |
| <i>CYP11A1</i> | rs1799814 | 15 | CC    | 322/554 | 1.00             | 0.67         | 0.52         | 67/554 | 1.00             | 0.94 | 0.96 | 310/727 | 1.00             | 0.66              | N/A          | 145/727 | 1.00           | 0.77              | N/A  |  |
|                |           |    | CA    | 46/72   | 1.21 (0.8-1.83)  |              |              | 9/72   | 1.07 (0.49-2.33) |      |      |         | 4/8              | 1.33 (0.38-4.70)  |              |         | 1/8            | 0.73 (0.09-6.12)  |      |  |
|                |           |    | AA    | 6/9     | 0.95 (0.31-2.93) |              |              | 1/9    | 0.71 (0.08-6.47) |      |      |         | 0/0              | N/A               |              |         | 0/0            | N/A               |      |  |
|                |           |    | CA/AA | 52/81   | 1.17 (0.79-1.74) | 0.43         |              | 10/81  | 1.02 (0.49-2.14) | 0.96 |      |         | 4/8              | 1.33 (0.38-4.7)   | 0.66         |         | 1/8            | 0.73 (0.09-6.12)  | 0.77 |  |
| <i>CYP11A2</i> | rs2470893 | 15 | GG    | 210/350 | 1.00             | 0.25         | 0.40         | 48/350 | 1.00             | 0.33 | 0.20 | 270/668 | 1.00             | <b>0.02</b>       | <b>0.006</b> | 138/668 | 1.00           | 0.72              | N/A  |  |
|                |           |    | GA    | 149/244 | 1.03 (0.78-1.37) |              |              | 29/244 | 0.89 (0.53-1.5)  |      |      |         | 41/64            | 1.78 (1.14-2.79)  |              |         | 8/64           | 0.72 (0.33-1.59)  |      |  |
|                |           |    | AA    | 18/42   | 0.61 (0.33-1.13) |              |              | 2/42   | 0.33 (0.07-1.45) |      |      |         | 3/3              | 2.80 (0.52-14.99) |              |         | 0/3            | N/A               |      |  |
|                |           |    | GA/AA | 167/286 | 0.97 (0.74-1.27) | 0.82         |              | 31/286 | 0.8 (0.48-1.33)  | 0.40 |      |         | 44/67            | 1.82 (1.18-2.83)  | <b>0.007</b> |         | 8/67           | 0.69 (0.31-1.52)  | 0.35 |  |
| <i>CYP11A2</i> | rs2472297 | 15 | GG    | 251/444 | 1.00             | 0.59         | 0.54         | 57/444 | 1.00             | 0.94 | 0.31 | 282/680 | 1.00             | 0.16              | 0.05         | 140/680 | 1.00           | 0.82              | N/A  |  |
|                |           |    | GA    | 113/173 | 1.16 (0.86-1.57) |              |              | 21/173 | 0.9 (0.51-1.58)  |      |      |         | 31/54            | 1.54 (0.94-2.51)  |              |         | 7/54           | 0.76 (0.33-1.77)  |      |  |
|                |           |    | AA    | 11/18   | 0.9 (0.4-2.04)   |              |              | 0/18   | 0 (0-)           |      |      |         | 2/2              | 2.70 (0.35-20.95) |              |         | 0/2            | N/A               |      |  |
|                |           |    | GA/AA | 124/191 | 1.13 (0.85-1.52) | 0.41         |              | 21/191 | 0.82 (0.47-1.44) | 0.50 |      |         | 33/56            | 1.58 (0.97-2.55)  | 0.06         |         | 7/56           | 0.74 (0.32-1.73)  | 0.49 |  |
| <i>CYP11A2</i> | rs2472304 | 15 | AA    | 134/228 | 1.00             | 0.86         | 1.00         | 30/228 | 1.00             | 0.86 | 0.62 | 7/11    | 1.00             | 0.15              | 0.06         | 2/11    | 1.00           | 0.48              | 0.32 |  |
|                |           |    | AG    | 181/318 | 0.94 (0.7-1.27)  |              |              | 37/318 | 0.87 (0.51-1.48) |      |      |         | 66/130           | 0.59 (0.21-1.71)  |              |         | 18/130         | 0.68 (0.13-3.6)   |      |  |
|                |           |    | GG    | 60/85   | 1.04 (0.68-1.58) |              |              | 12/85  | 0.86 (0.39-1.89) |      |      |         | 241/592          | 0.46 (0.16-1.30)  |              |         | 127/592        | 0.96 (0.19-4.8)   |      |  |
|                |           |    | AG/GG | 241/403 | 0.96 (0.73-1.27) | 0.79         |              | 49/403 | 0.86 (0.52-1.44) | 0.58 |      |         | 307/722          | 0.51 (0.18-1.43)  | 0.20         |         | 145/722        | 0.89 (0.18-4.4)   | 0.88 |  |
| <i>CYP11A2</i> | rs762551  | 15 | AA    | 183/301 | 1.00             | 0.70         | 0.68         | 38/301 | 1.00             | 0.92 | 0.68 | 102/250 | 1.00             | 0.97              | 0.89         | 52/250  | 1.00           | 0.39              | 0.22 |  |
|                |           |    | AC    | 165/290 | 0.89 (0.67-1.18) |              |              | 36/290 | 0.92 (0.55-1.54) |      |      |         | 154/348          | 1.04 (0.76-1.42)  |              |         | 74/348         | 0.93 (0.62-1.4)   |      |  |
|                |           |    | CC    | 29/44   | 1.03 (0.61-1.75) |              |              | 5/44   | 0.84 (0.3-2.34)  |      |      |         | 59/137           | 1.02 (0.69-1.52)  |              |         | 21/137         | 0.68 (0.38-1.2)   |      |  |
|                |           |    | AC/CC | 194/334 | 0.91 (0.7-1.19)  | 0.50         |              | 41/334 | 0.91 (0.55-1.49) | 0.70 |      |         | 213/485          | 1.03 (0.77-1.39)  | 0.82         |         | 95/485         | 0.86 (0.58-1.27)  | 0.45 |  |
| <i>CYP11B1</i> | rs1056836 | 2  | GG    | 114/191 | 1.00             | 0.76         | 0.47         | 24/191 | 1.00             | 0.41 | 0.95 | 17/39   | 1.00             | 0.94              | 0.82         | 11/39   | 1.00           | 0.43              | 0.33 |  |
|                |           |    | GC    | 190/329 | 1.05 (0.77-1.44) |              |              | 44/329 | 1.34 (0.75-2.4)  |      |      |         | 116/284          | 0.95 (0.5-1.79)   |              |         | 53/284         | 0.64 (0.3-1.38)   |      |  |
|                |           |    | CC    | 71/115  | 1.17 (0.78-1.74) |              |              | 11/115 | 0.88 (0.4-1.96)  |      |      |         | 182/413          | 1 (0.53-1.86)     |              |         | 83/413         | 0.61 (0.29-1.29)  |      |  |
|                |           |    | GC/CC | 261/444 | 1.08 (0.8-1.46)  | 0.60         |              | 55/444 | 1.21 (0.69-2.13) | 0.50 |      |         | 298/697          | 0.97 (0.53-1.8)   | 0.93         |         | 136/697        | 0.62 (0.3-1.29)   | 0.20 |  |
| <i>CYP11B1</i> | rs1800440 | 2  | AA    | 246/439 | 1.00             | 0.56         | 0.35         | 55/439 | 1.00             | 0.78 | 0.50 | 288/691 | 1.00             | 0.16              | N/A          | 141/691 | 1.00           | 0.98              | N/A  |  |
|                |           |    | AG    | 117/173 | 1.18 (0.87-1.59) |              |              | 22/173 | 0.89 (0.5-1.56)  |      |      |         | 27/37            | 1.69 (0.98-2.91)  |              |         | 6/37           | 0.91 (0.36-2.28)  |      |  |
|                |           |    | GG    | 14/20   | 1.1 (0.53-2.29)  |              |              | 2/20   | 0.61 (0.12-2.97) |      |      |         | 0/4              | 0 (0-)            |              |         | 0/4            | N/A               |      |  |
|                |           |    | AG/GG | 131/193 | 1.17 (0.88-1.56) | 0.29         |              | 24/193 | 0.86 (0.49-1.48) | 0.58 |      |         | 27/41            | 1.54 (0.91-2.63)  | 0.11         |         | 6/41           | 0.82 (0.33-2.04)  | 0.67 |  |
| <i>CYP2C9</i>  | rs1057910 | 10 | AA    | 321/532 | 1.00             | 0.94         | 0.91         | 65/532 | 1.00             | 0.90 | N/A  | 301/708 | 1.00             | 0.47              | N/A          | 139/708 | 1.00           | 0.68              | N/A  |  |
|                |           |    | AC    | 51/93   | 0.96 (0.65-1.41) |              |              | 13/93  | 1.17 (0.6-2.29)  |      |      |         | 12/19            | 1.33 (0.61-2.86)  |              |         | 3/19           | 0.77 (0.22-2.71)  |      |  |
|                |           |    | CC    | 2/4     | 1.28 (0.22-7.51) |              |              | 0/4    | N/A              |      |      |         | 0/0              | N/A               |              |         | 1/0            | N/A               |      |  |
|                |           |    | AC/CC | 53/97   | 0.97 (0.66-1.41) | 0.86         |              | 13/97  | 1.14 (0.58-2.23) | 0.71 |      |         | 12/19            | 1.33 (0.61-2.86)  | 0.47         |         | 4/19           | 1.04 (0.34-3.21)  | 0.94 |  |
| <i>CYP3A4</i>  | rs4987161 | 7  | AA    | 366/627 | 1.00             | 0.24         | 0.21         | 77/627 | 1.00             | 0.94 | N/A  | 308/734 | 1.00             | 1.00              | N/A          | 147/734 | N/A            | N/A               | N/A  |  |
|                |           |    | AG    | 10/7    | 2.41 (0.87-6.68) |              |              | 2/7    | 1.39 (0.22-8.78) |      |      |         | 6/0              | N/A               |              |         | 0/0            | N/A               |      |  |
|                |           |    | GG    | 0/1     | 0 (0-)           |              |              | 0/1    | N/A              |      |      |         | 0/0              | N/A               |              |         | 0/0            | N/A               |      |  |
|                |           |    | AG/GG | 10/8    | 2.12 (0.80-5.68) | 0.13         |              | 2/8    | 1.25 (0.2-7.67)  | 0.81 |      |         | 6/0              | N/A               | N/A          |         | 0/0            | N/A               | N/A  |  |
| <i>CYP3A5</i>  | rs776746  | 7  | GG    | 318/541 | 1.00             | 0.28         | 0.46         | 67/541 | 1.00             | 1.00 | N/A  | 27/79   | 1.00             | 0.54              | 0.75         | 10/79   | 1.00           | 0.42              | 0.49 |  |
|                |           |    | GA    | 58/91   | 0.94 (0.64-1.39) |              |              | 12/91  | 0.97 (0.48-1.96) |      |      |         | 142/298          | 1.32 (0.80-2.20)  |              |         | 62/298         | 1.64 (0.78-3.46)  |      |  |
|                |           |    | AA    | 1/3     | 0.11 (0.01-1.66) |              |              | 0/3    | N/A              |      |      |         | 146/359          | 1.23 (0.74-2.06)  |              |         | 74/359         | 1.57 (0.74-3.32)  |      |  |
|                |           |    | GA/AA | 59/94   | 0.91 (0.62-1.34) | 0.63         |              | 12/94  | 0.92 (0.46-1.86) | 0.82 |      |         | 288/657          | 1.28 (0.79-2.09)  | 0.32         |         | 136/657        | 1.61 (0.78-3.30)  | 0.20 |  |
| <i>CYP3A7</i>  | rs2257401 | 7  | GG    | 302/526 | 1.00             | 0.23         | 0.89         | 66/526 | 1.00             | 0.93 | 0.70 | 64/160  | 1.00             | 0.91              | 0.69         | 21/160  | 1.00           | 0.15              | 0.13 |  |
|                |           |    | GC    | 72/103  | 1.11 (0.78-1.58) |              |              | 12/103 | 0.89 (0.44-1.76) |      |      |         | 160/375          | 1.07 (0.75-1.54)  |              |         | 80/375         | 1.67 (0.98-2.85)  |      |  |
|                |           |    | CC    | 2/6     | 0.22 (0.04-1.39) |              |              | 1/6    | 0.80 (0.08-8.00) |      |      |         | 81/194           | 1.09 (0.72-1.64)  |              |         | 45/194         | 1.67 (0.93-3.00)  |      |  |
|                |           |    | GC/CC | 74/109  | 1.04 (0.73-1.48) | 0.81         |              | 13/109 | 0.88 (0.45-1.72) | 0.71 |      |         | 241/569          | 1.08 (0.76-1.52)  | 0.67         |         | 125/569        | 1.67 (0.99-2.80)  | 0.07 |  |
| <i>ESR1</i>    | rs1801132 | 6  | GG    | 219/433 | 1.00             | <b>0.004</b> | <b>0.002</b> | 47/433 | 1.00             | 0.17 | 0.10 | 247/575 | 1.00             | 0.95              | 0.76         | 115/575 | 1.00           | 0.43              | 0.61 |  |
|                |           |    | GC    | 130/185 | 1.34 (1.00-1.80) |              |              | 27/185 | 1.25 (0.73-2.14) |      |      |         | 65/153           | 0.96 (0.68-1.35)  |              |         | 28/153         | 0.99 (0.61-1.58)  |      |  |
|                |           |    | CC    | 25/18   | 2.69 (1.38-5.23) |              |              | 5/18   | 2.69 (0.92-7.89) |      |      |         | 3/6              | 0.85 (0.20-3.68)  |              |         | 3/6            | 2.62 (0.61-11.29) |      |  |

|                |           |    |       |         |                  |              |              |        |                   |                  |             |         |                  |                  |             |         |                  |                  |        |
|----------------|-----------|----|-------|---------|------------------|--------------|--------------|--------|-------------------|------------------|-------------|---------|------------------|------------------|-------------|---------|------------------|------------------|--------|
|                |           |    | GC/CC | 155/203 | 1.46 (1.10-1.93) | <b>0.008</b> |              |        | 32/203            | 1.38 (0.84-2.30) | 0.21        |         | 68/159           | 0.95 (0.68-1.34) | 0.78        |         | 31/159           | 1.05 (0.66-1.66) | 0.84   |
| <i>ESR1</i>    | rs2046210 | 6  | GG    | 132/256 | 1.00             | <b>0.04</b>  | <b>0.02</b>  | 30/256 | 1.00              | 0.18             | 0.44        | 37/109  | 1.00             | 0.05             | 0.59        | 24/109  | 1.00             | 0.59             | 0.75   |
|                |           |    | GA    | 183/310 | 1.11 (0.82-1.49) |              |              | 34/310 | 0.82 (0.48-1.42)  |                  |             | 162/316 | 1.49 (0.96-2.3)  |                  |             | 57/316  | 0.75 (0.44-1.30) |                  |        |
|                |           |    | AA    | 62/70   | 1.74 (1.14-2.67) |              |              | 14/70  | 1.62 (0.79-3.32)  |                  |             | 116/309 | 1.08 (0.69-1.7)  |                  |             | 66/309  | 0.84 (0.49-1.45) |                  |        |
|                |           |    | GA/AA | 245/380 | 1.22 (0.92-1.61) | 0.17         |              | 48/380 | 0.97 (0.58-1.61)  | 0.90             |             | 278/625 | 1.3 (0.85-1.97)  | 0.22             |             | 123/625 | 0.8 (0.48-1.32)  | 0.38             |        |
| <i>ESR1</i>    | rs2228480 | 6  | GG    | 255/444 | 1.00             | 0.28         | 0.97         | 54/444 | 1.00              | 0.71             | 0.84        | 207/515 | 1.00             | 0.26             | 0.10        | 99/515  | 1.00             | 0.74             | 0.92   |
|                |           |    | GA    | 111/165 | 1.13 (0.83-1.53) |              |              | 23/165 | 1.06 (0.61-1.84)  |                  |             | 92/193  | 1.23 (0.9-1.68)  |                  |             | 41/193  | 1.11 (0.73-1.67) |                  |        |
|                |           |    | AA    | 6/18    | 0.52 (0.19-1.39) |              |              | 1/18   | 0.41 (0.04-3.91)  |                  |             | 11/17   | 1.57 (0.7-3.54)  |                  |             | 2/17    | 0.64 (0.14-2.86) |                  |        |
|                |           |    | GA/AA | 117/183 | 1.07 (0.79-1.43) | 0.67         |              | 24/183 | 1.01 (0.59-1.73)  | 0.98             |             | 103/210 | 1.26 (0.94-1.7)  | 0.13             |             | 43/210  | 1.07 (0.71-1.6)  | 0.76             |        |
| <i>ESR1</i>    | rs2234693 | 6  | AA    | 123/185 | 1.00             | 0.45         | 0.78         | 20/185 | 1.00              | 0.90             | 0.78        | 71/168  | 1.00             | 0.59             | 0.47        | 30/168  | 1.00             | 0.30             | 0.75   |
|                |           |    | AG    | 182/331 | 0.84 (0.61-1.14) |              |              | 44/331 | 1.15 (0.64-2.06)  |                  |             | 159/355 | 1.04 (0.73-1.47) |                  |             | 81/355  | 1.29 (0.81-2.08) |                  |        |
|                |           |    | GG    | 72/119  | 0.99 (0.67-1.47) |              |              | 15/119 | 1.09 (0.51-2.3)   |                  |             | 84/212  | 0.88 (0.59-1.3)  |                  |             | 36/212  | 0.94 (0.55-1.63) |                  |        |
|                |           |    | AG/GG | 254/450 | 0.88 (0.66-1.17) | 0.37         |              | 59/450 | 1.13 (0.65-1.98)  | 0.66             |             | 243/567 | 0.98 (0.7-1.36)  | 0.89             |             | 117/567 | 1.16 (0.74-1.83) | 0.51             |        |
| <i>ESR1</i>    | rs3020314 | 6  | AA    | 157/331 | 1.00             | <b>0.005</b> | <b>0.001</b> | 29/331 | 1.00              | <b>0.03</b>      | <b>0.02</b> | 24/58   | 1.00             | 0.96             | 0.84        | 13/58   | 1.00             | 0.72             | 0.63   |
|                |           |    | AG    | 169/254 | 1.46 (1.1-1.95)  |              |              | 43/254 | 2.01 (1.19-3.39)  |                  |             | 126/297 | 0.98 (0.57-1.69) |                  |             | 57/297  | 0.76 (0.38-1.52) |                  |        |
|                |           |    | GG    | 51/51   | 1.88 (1.18-3.00) |              |              | 7/51   | 1.78 (0.71-4.48)  |                  |             | 165/381 | 1.02 (0.59-1.74) |                  |             | 77/381  | 0.77 (0.39-1.52) |                  |        |
|                |           |    | AG/GG | 220/305 | 1.53 (1.17-2.01) | <b>0.002</b> |              | 50/305 | 1.97 (1.19-3.27)  | <b>0.01</b>      |             | 291/678 | 1 (0.59-1.69)    | 1.00             |             | 134/678 | 0.76 (0.39-1.48) | 0.42             |        |
| <i>ESR1</i>    | rs3798577 | 6  | AA    | 105/196 | 1.00             | 0.34         | 0.88         | 26/196 | 1.00              | 0.90             | 0.65        | 108/247 | 1.00             | 0.35             | 0.72        | 48/247  | 1.00             | 0.83             | 0.69   |
|                |           |    | AG    | 204/309 | 1.18 (0.86-1.62) |              |              | 39/309 | 0.9 (0.52-1.56)   |                  |             | 134/343 | 0.86 (0.63-1.18) |                  |             | 74/343  | 1.02 (0.68-1.55) |                  |        |
|                |           |    | GG    | 67/130  | 0.93 (0.62-1.39) |              |              | 14/130 | 0.86 (0.42-1.77)  |                  |             | 73/144  | 1.12 (0.77-1.63) |                  |             | 25/144  | 0.87 (0.51-1.51) |                  |        |
|                |           |    | AG/GG | 271/439 | 1.11 (0.82-1.49) | 0.50         |              | 53/439 | 0.89 (0.53-1.5)   | 0.66             |             | 207/487 | 0.94 (0.7-1.25)  | 0.67             |             | 99/487  | 0.98 (0.66-1.45) | 0.93             |        |
| <i>ESR1</i>    | rs9383938 | 6  | CC    | 299/519 | 1.00             | 0.47         | 0.33         | 61/519 | 1.00              | 0.44             | 0.21        | 228/515 | 1.00             | 0.66             | 0.87        | 97/515  | 1.00             | 0.16             | 0.39   |
|                |           |    | CA    | 73/111  | 1.23 (0.87-1.74) |              |              | 16/111 | 1.34 (0.72-2.49)  |                  |             | 79/205  | 0.91 (0.66-1.25) |                  |             | 49/205  | 1.37 (0.92-2.04) |                  |        |
|                |           |    | AA    | 3/6     | 0.83 (0.18-3.74) |              |              | 2/6    | 2.32 (0.42-12.95) |                  |             | 8/15    | 1.34 (0.54-3.34) |                  |             | 1/15    | 0.34 (0.04-2.72) |                  |        |
|                |           |    | CA/AA | 76/117  | 1.21 (0.86-1.71) | 0.27         |              | 18/117 | 1.4 (0.78-2.54)   | 0.26             |             | 87/220  | 0.94 (0.69-1.27) | 0.68             |             | 50/220  | 1.3 (0.87-1.92)  | 0.20             |        |
| <i>ESR1</i>    | rs9397435 | 6  | AA    | 305/541 | 1.00             | 0.21         | 0.09         | 65/541 | 1.00              | 0.37             | 0.34        | 259/604 | 1.00             | 0.79             | 0.87        | 122/604 | 1.00             | 0.97             | N/A    |
|                |           |    | AG    | 69/90   | 1.38 (0.96-1.99) |              |              | 12/90  | 1.11 (0.56-2.22)  |                  |             | 54/125  | 1.02 (0.71-1.47) |                  |             | 25/125  | 0.94 (0.57-1.53) |                  |        |
|                |           |    | GG    | 3/5     | 1.35 (0.31-5.87) |              |              | 2/5    | 3.39 (0.61-18.98) |                  |             | 2/7     | 0.56 (0.11-2.97) |                  |             | 0/7     | N/A              |                  |        |
|                |           |    | AG/GG | 72/95   | 1.38 (0.96-1.97) | 0.08         |              | 14/95  | 1.24 (0.65-2.37)  | 0.52             |             | 56/132  | 1 (0.7-1.42)     | 0.99             |             | 25/132  | 0.89 (0.55-1.45) | 0.64             |        |
| <i>ESR2</i>    | rs1255998 | 14 | CC    | 281/503 | 1.00             | 0.36         | 0.59         | 62/503 | 1.00              | 0.65             | 0.58        | 71/154  | 1.00             | 0.89             | 0.96        | 25/154  | 1.00             | 0.61             | .65475 |
|                |           |    | CG    | 91/125  | 1.18 (0.85-1.64) |              |              | 16/125 | 0.94 (0.51-1.74)  |                  |             | 151/377 | 0.92 (0.65-1.32) |                  |             | 78/377  | 1.29 (0.78-2.13) |                  |        |
|                |           |    | GG    | 4/7     | 0.45 (0.09-2.31) |              |              | 1/7    | 0.28 (0.02-4.24)  |                  |             | 91/204  | 0.98 (0.66-1.46) |                  |             | 42/204  | 1.17 (0.67-2.05) |                  |        |
|                |           |    | CG/GG | 95/132  | 1.14 (0.83-1.58) | 0.42         |              | 17/132 | 0.89 (0.48-1.65)  | 0.72             |             | 242/581 | 0.94 (0.68-1.32) | 0.73             |             | 120/581 | 1.25 (0.77-2.02) | 0.37             |        |
| <i>ESR2</i>    | rs1256049 | 14 | GG    | 355/598 | 1.00             | 0.85         | N/A          | 78/598 | 1.00              | 0.24             | N/A         | 266/595 | 1.00             | 0.45             | 0.22        | 118/595 | 1.00             | 1.00             | N/A    |
|                |           |    | GA    | 21/35   | 0.84 (0.46-1.52) |              |              | 1/35   | 0.17 (0.02-1.31)  |                  |             | 45/129  | 0.79 (0.54-1.16) |                  |             | 29/129  | 1.02 (0.64-1.63) |                  |        |
|                |           |    | AA    | 0/1     | N/A              |              |              | 0/1    | N/A               |                  |             | 3/11    | 0.74 (0.2-2.8)   |                  |             | 0/11    | N/A              |                  |        |
|                |           |    | GA/AA | 21/36   | 0.81 (0.45-1.47) | 0.50         |              | 1/36   | 0.17 (0.02-1.27)  | 0.08             |             | 48/140  | 0.79 (0.54-1.14) | 0.21             |             | 29/140  | 0.94 (0.59-1.5)  | 0.80             |        |
| <i>ESR2</i>    | rs1256065 | 14 | AA    | 135/227 | 1.00             | 0.98         | 0.83         | 27/227 | 1.00              | 0.36             | 0.71        | 249/573 | 1.00             | 0.33             | 0.57        | 110/573 | 1.00             | 0.31             | 0.40   |
|                |           |    | AC    | 173/291 | 0.98 (0.72-1.32) |              |              | 42/291 | 1.25 (0.72-2.16)  |                  |             | 65/150  | 1.03 (0.72-1.45) |                  |             | 37/150  | 1.41 (0.91-2.19) |                  |        |
|                |           |    | CC    | 69/118  | 0.96 (0.65-1.42) |              |              | 10/118 | 0.75 (0.34-1.65)  |                  |             | 1/12    | 0.21 (0.03-1.66) |                  |             | 0/12    | N/A              |                  |        |
|                |           |    | AC/CC | 242/409 | 0.97 (0.73-1.29) | 0.85         |              | 52/409 | 1.11 (0.65-1.88)  | 0.70             |             | 66/162  | 0.97 (0.69-1.37) | 0.86             |             | 37/162  | 1.33 (0.86-2.05) | 0.21             |        |
| <i>ESR2</i>    | rs2987983 | 14 | AA    | 161/275 | 1.00             | 0.40         | 0.39         | 30/275 | 1.00              | 0.66             | 0.67        | 47/130  | 1.00             | 0.30             | 0.12        | 28/130  | 1.00             | 0.89             | 0.94   |
|                |           |    | AG    | 161/285 | 0.97 (0.73-1.3)  |              |              | 41/285 | 1.26 (0.75-2.13)  |                  |             | 144/351 | 1.19 (0.8-1.79)  |                  |             | 66/351  | 0.89 (0.54-1.48) |                  |        |
|                |           |    | GG    | 54/75   | 1.3 (0.85-1.98)  |              |              | 8/75   | 1 (0.42-2.42)     |                  |             | 123/255 | 1.38 (0.91-2.09) |                  |             | 53/255  | 0.95 (0.56-1.61) |                  |        |
|                |           |    | AG/GG | 215/360 | 1.04 (0.79-1.37) | 0.78         |              | 49/360 | 1.21 (0.73-2)     | 0.46             |             | 267/606 | 1.27 (0.87-1.86) | 0.22             |             | 119/606 | 0.92 (0.57-1.47) | 0.72             |        |
| <i>ESR2</i>    | rs3020450 | 14 | GG    | 160/265 | 1.00             | 0.21         | 0.33         | 30/265 | 1.00              | 0.83             | 0.67        | 99/249  | 1.00             | 0.45             | 0.53        | 59/249  | 1.00             | 0.31             | 0.46   |
|                |           |    | GA    | 162/298 | 0.94 (0.7-1.26)  |              |              | 41/298 | 1.17 (0.69-1.99)  |                  |             | 160/356 | 1.22 (0.89-1.66) |                  |             | 60/356  | 0.73 (0.48-1.1)  |                  |        |
|                |           |    | AA    | 55/73   | 1.37 (0.9-2.09)  |              |              | 8/73   | 1.08 (0.45-2.58)  |                  |             | 56/129  | 1.08 (0.72-1.62) |                  |             | 28/129  | 0.90 (0.54-1.50) |                  |        |
|                |           |    | GA/AA | 217/371 | 1.02 (0.78-1.35) | 0.86         |              | 49/371 | 1.16 (0.7-1.92)   | 0.57             |             | 216/485 | 1.18 (0.88-1.58) | 0.27             |             | 88/485  | 0.78 (0.53-1.13) | 0.19             |        |
| <i>HSD17B2</i> | rs4445895 | 16 | GG    | 128/221 | 1.00             | 0.98         | 0.96         | 44/221 | 1.00              | <b>0.005</b>     | <b>0.01</b> | 133/352 | 1.00             | 0.12             | <b>0.04</b> | 72/352  | 1.00             | 0.53             | 0.67   |
|                |           |    | GA    | 187/309 | 1.03 (0.76-1.39) |              |              | 24/309 | 0.41 (0.24-0.71)  |                  |             | 139/308 | 1.23 (0.92-1.66) |                  |             | 65/308  | 1.08 (0.74-1.59) |                  |        |
|                |           |    | AA    | 61/106  | 1 (0.67-1.5)     |              |              | 11/106 | 0.54 (0.26-1.12)  |                  |             | 43/75   | 1.54 (0.99-2.40) |                  |             | 10/75   | 0.71 (0.35-1.47) |                  |        |
|                |           |    | GA/AA | 248/415 | 1.02 (0.77-1.36) | 0.89         |              | 35/415 | 0.44 (0.27-0.73)  | <b>0.001</b>     |             | 182/383 | 1.29 (0.98-1.71) | 0.07             |             | 75/383  | 1.01 (0.7-1.46)  | 0.95             |        |
| <i>PR</i>      | rs1042838 | 11 | CC    | 268/435 | 1.00             | 0.40         | 0.48         | 57/435 | 1.00              | 0.99             | N/A         | 298/678 | 1.00             | 0.13             | 0.13        | 141/678 | 1.00             | 0.07             | N/A    |
|                |           |    | CA    | 93/177  | 0.82 (0.6-1.12)  |              |              | 21/177 | 1.04 (0.6-1.81)   |                  |             | 15/49   | 0.61 (0.32-1.16) |                  |             | 4/49    | 0.37 (0.12-1.08) |                  |        |
|                |           |    | AA    | 12/17   | 1.22 (0.54-2.75) |              |              | 0/17   | N/A               |                  |             | 0/0     | N/A              |                  |             | 0/0     | N/A              |                  |        |

|                |            |   |       |         |                  |      |      |        |                  |      |      |         |                  |             |             |         |                  |      |      |
|----------------|------------|---|-------|---------|------------------|------|------|--------|------------------|------|------|---------|------------------|-------------|-------------|---------|------------------|------|------|
|                |            |   | CA/AA | 105/194 | 0.86 (0.64-1.15) | 0.31 |      | 21/194 | 0.93 (0.54-1.62) | 0.81 |      | 15/49   | 0.61 (0.32-1.16) | 0.13        |             | 4/49    | 0.37 (0.12-1.08) | 0.07 |      |
| <i>SRD5A1</i>  | rs3736316  | 5 | GG    | 135/222 | 1.00             | 0.90 | 0.64 | 31/222 | 1.00             | 0.79 | 0.50 | 148/342 | 1.00             | 0.55        | 0.48        | 67/342  | 1.00             | 0.84 | 0.61 |
|                |            |   | GA    | 178/299 | 0.96 (0.71-1.29) |      |      | 36/299 | 0.87 (0.51-1.48) |      |      | 131/324 | 0.99 (0.74-1.32) |             |             | 66/324  | 1.12 (0.76-1.65) |      |      |
|                |            |   | AA    | 64/114  | 0.91 (0.61-1.36) |      |      | 12/114 | 0.79 (0.37-1.67) |      |      | 35/70   | 1.28 (0.8-2.04)  |             |             | 14/70   | 1.1 (0.58-2.11)  |      |      |
|                |            |   | GA/AA | 242/413 | 0.94 (0.71-1.25) | 0.69 |      | 48/413 | 0.85 (0.51-1.41) | 0.52 |      | 166/394 | 1.04 (0.79-1.37) | 0.79        |             | 80/394  | 1.12 (0.77-1.62) | 0.55 |      |
| <i>SRD5A1</i>  | rs3822430  | 5 | AA    | 140/223 | 1.00             | 0.70 | 0.42 | 31/223 | 1.00             | 0.79 | 0.50 | 148/343 | 1.00             | 0.50        | 0.44        | 67/343  | 1.00             | 0.81 | 0.57 |
|                |            |   | AG    | 173/296 | 0.9 (0.67-1.21)  |      |      | 36/296 | 0.88 (0.51-1.5)  |      |      | 130/323 | 0.99 (0.74-1.33) |             |             | 66/323  | 1.13 (0.77-1.66) |      |      |
|                |            |   | GG    | 64/116  | 0.86 (0.58-1.28) |      |      | 12/116 | 0.78 (0.37-1.66) |      |      | 35/69   | 1.3 (0.81-2.08)  |             |             | 14/69   | 1.12 (0.58-2.14) |      |      |
|                |            |   | AC/GG | 237/412 | 0.89 (0.67-1.18) | 0.41 |      | 48/412 | 0.85 (0.51-1.42) | 0.54 |      | 165/392 | 1.04 (0.79-1.38) | 0.76        |             | 80/392  | 1.13 (0.78-1.63) | 0.52 |      |
| <i>SRD5A2</i>  | rs523349   | 2 | CC    | 187/312 | 1.00             | 0.63 | 0.75 | 36/312 | 1.00             | 0.57 | 0.77 | 184/370 | 1.00             | 0.08        | 0.08        | 82/370  | 1.00             | 0.58 | 0.30 |
|                |            |   | CG    | 156/257 | 1.06 (0.8-1.41)  |      |      | 36/257 | 1.28 (0.76-2.17) |      |      | 107/308 | 0.69 (0.51-0.99) |             |             | 57/308  | 0.86 (0.58-1.26) |      |      |
|                |            |   | GG    | 34/65   | 0.83 (0.51-1.36) |      |      | 7/65   | 0.9 (0.37-2.22)  |      |      | 24/58   | 0.90 (0.53-1.52) |             |             | 8/58    | 0.71 (0.32-1.6)  |      |      |
|                |            |   | CG/GG | 190/322 | 1.01 (0.77-1.33) | 0.93 |      | 43/322 | 1.2 (0.73-1.98)  | 0.48 |      | 131/366 | 0.72 (0.54-1.14) | 0.09        |             | 65/366  | 0.84 (0.58-1.21) | 0.34 |      |
| <i>UGT1A1</i>  | rs10929302 | 2 | GG    | 175/291 | 1.00             | 0.45 | 0.43 | 38/291 | 1.00             | 0.50 | 0.94 | 160/368 | 1.00             | 0.69        | 0.81        | 73/368  | 1.00             | 0.07 | 0.49 |
|                |            |   | GA    | 169/278 | 1.02 (0.76-1.35) |      |      | 31/278 | 0.8 (0.47-1.38)  |      |      | 132/300 | 1.06 (0.79-1.41) |             |             | 68/300  | 1.21 (0.83-1.76) |      |      |
|                |            |   | AA    | 33/67   | 0.75 (0.46-1.21) |      |      | 10/67  | 1.26 (0.58-2.72) |      |      | 23/65   | 0.84 (0.49-1.42) |             |             | 5/65    | 0.39 (0.15-1.03) |      |      |
|                |            |   | GA/AA | 202/345 | 0.96 (0.73-1.26) | 0.77 |      | 41/345 | 0.89 (0.54-1.47) | 0.65 |      | 155/365 | 1.02 (0.77-1.34) | 0.90        |             | 73/365  | 1.06 (0.73-1.53) | 0.76 |      |
| <i>UGT1A1</i>  | rs4124874  | 2 | AA    | 96/184  | 1.00             | 0.28 | 0.70 | 26/184 | 1.00             | 0.57 | 0.81 | 10/20   | 1.00             | 0.09        | 0.08        | 6/20    | 1.00             | 0.36 | 0.85 |
|                |            |   | AC    | 190/294 | 1.28 (0.92-1.77) |      |      | 32/294 | 0.74 (0.41-1.34) |      |      | 81/241  | 0.72 (0.31-1.66) |             |             | 39/241  | 0.5 (0.18-1.41)  |      |      |
|                |            |   | CC    | 91/158  | 1.07 (0.73-1.56) |      |      | 21/158 | 0.94 (0.49-1.78) |      |      | 223/474 | 1.03 (0.45-2.33) |             |             | 102/474 | 0.61 (0.22-1.67) |      |      |
|                |            |   | AC/CC | 281/452 | 1.2 (0.89-1.63)  | 0.24 |      | 53/452 | 0.81 (0.47-1.39) | 0.45 |      | 304/715 | 0.9 (0.4-2.03)   | 0.80        |             | 141/715 | 0.57 (0.21-1.53) | 0.26 |      |
| <i>UGT1A6</i>  | rs2070959  | 2 | AA    | 163/256 | 1.00             | 0.80 | 0.80 | 36/256 | 1.00             | 0.08 | 0.73 | 172/443 | 1.00             | 0.10        | 0.42        | 89/443  | 1.00             | 0.16 | 0.40 |
|                |            |   | AG    | 170/306 | 0.91 (0.68-1.22) |      |      | 28/306 | 0.57 (0.32-1.01) |      |      | 130/243 | 1.46 (1.10-1.95) |             |             | 54/243  | 1.1 (0.75-1.62)  |      |      |
|                |            |   | GG    | 44/71   | 1.01 (0.64-1.57) |      |      | 15/71  | 1.63 (0.82-3.27) |      |      | 12/49   | 0.61 (0.31-1.19) |             |             | 3/49    | 0.33 (0.1-1.11)  |      |      |
|                |            |   | AG/GG | 214/377 | 0.93 (0.71-1.22) | 0.61 |      | 43/377 | 0.76 (0.46-1.26) | 0.29 |      | 142/292 | 1.31 (0.92-1.73) | 0.08        |             | 57/292  | 0.98 (0.67-1.42) | 0.90 |      |
| <i>UGT1A9</i>  | rs6714486  | 2 | TT    | 324/567 | 1.00             | 0.40 | 0.32 | 75/567 | 1.00             | 0.41 | N/A  | 240/513 | 1.00             | 0.09        | <b>0.04</b> | 101/513 | 1.00             | 0.16 | 0.39 |
|                |            |   | TA    | 45/60   | 1.35 (0.87-2.1)  |      |      | 4/60   | 0.47 (0.16-1.41) |      |      | 64/187  | 0.70 (0.50-0.98) |             |             | 43/187  | 1.08 (0.71-1.63) |      |      |
|                |            |   | AA    | 0/2     | N/A              |      |      | 0/2    | N/A              |      |      | 10/26   | 0.70 (0.31-1.56) |             |             | 1/26    | 0.14 (0.02-1.14) |      |      |
|                |            |   | TA/AA | 45/62   | 1.3 (0.84-2.01)  | 0.23 |      | 4/62   | 0.45 (0.15-1.35) | 0.16 |      | 74/213  | 0.70 (0.51-0.96) | <b>0.03</b> |             | 44/213  | 0.96 (0.64-1.44) | 0.84 |      |
| <i>UGT2B15</i> | rs1902023  | 4 | AA    | 110/166 | 1.00             | 0.07 | 0.06 | 23/166 | 1.00             | 0.33 | 0.14 | 52/142  | 1.00             | 0.20        | 0.98        | 21/142  | 1.00             | 0.27 | 0.35 |
|                |            |   | AC    | 193/322 | 0.82 (0.59-1.12) |      |      | 40/322 | 0.80 (0.45-1.41) |      |      | 167/354 | 1.35 (0.92-1.97) |             |             | 77/354  | 1.57 (0.91-2.7)  |      |      |
|                |            |   | CC    | 71/147  | 0.62 (0.42-0.93) |      |      | 15/147 | 0.57 (0.27-1.19) |      |      | 95/240  | 1.07 (0.71-1.62) |             |             | 49/240  | 1.43 (0.80-2.54) |      |      |
|                |            |   | AC/CC | 264/469 | 0.76 (0.56-1.02) | 0.07 |      | 55/469 | 0.73 (0.42-1.25) | 0.25 |      | 262/594 | 1.23 (0.86-1.77) | 0.26        |             | 126/594 | 1.51 (0.90-2.54) | 0.12 |      |

Abbreviations: Ca/Co, number of cases and controls. OR, odds ratio; 95%CI, 95% confidence interval; p-trend, p value for linear trend before correction for multiple testing.

a. Adjusted for age at diagnosis (continuous), education (less than high school, high school, college and graduate school), family history of breast cancer (yes, no), history of benign breast disease (yes, no), menopausal status (premenopausal, postmenopausal), number of full pregnancy (continuous), breast feeding (yes, no, nulliparous), Hormone Replacement Therapy (HRT, yes, no), body mass index (continuous), proportion of European ancestry (continuous) and estrogen months

b. P, p value calculated using a genotypic (codominant) model.

c. OR, 95%CI and corresponding p values were also calculated for each SNP after heterozygotes and rare homozygotes (dominant model).
