# Supplementary material
Source: PubMed Central journal article supplement (PMC4214251)
Supplement: NIHMS635292-supplement-5.pdf [file NIHMS635292-supplement-5.pdf]

Supplementary Table 4. ORs and 95% CIs of all SNPs among European American (EA) and African American (AA) women by lifetime estrogen exposure in WCHS.

| Gene    | SNP        | Chr. | Geno | European American                            |                        |         |                                  |                   |         | African American                |                  |         |                                  |                  |         |
|---------|------------|------|------|----------------------------------------------|------------------------|---------|----------------------------------|-------------------|---------|---------------------------------|------------------|---------|----------------------------------|------------------|---------|
|         |            |      |      | Long Lifetime Estrogen Exposure <sup>b</sup> |                        |         | Short Lifetime Estrogen Exposure |                   |         | Long Lifetime Estrogen Exposure |                  |         | Short Lifetime Estrogen Exposure |                  |         |
|         |            |      |      | Ca/Co                                        | OR(95%CI) <sup>a</sup> | P-trend | Ca/Co                            | OR(95%CI)         | P-trend | Ca/Co                           | OR(95%CI)        | P-trend | Ca/Co                            | OR(95%CI)        | P-trend |
| COMT    | rs4633     | 22   | GG   | 84/79                                        | 1.00                   | 0.85    | 64/86                            | 1.00              | 0.92    | 35/40                           | 1.00             | 0.75    | 22/36                            | 1.00             | 0.36    |
|         |            |      | GA   | 174/155                                      | 1.09 (0.73-1.62)       |         | 149/149                          | 1.28 (0.84-1.97)  |         | 155/161                         | 1.14 (0.66-1.95) |         | 119/152                          | 1.33 (0.73-2.44) |         |
|         |            |      | AA   | 87/78                                        | 1.04 (0.66-1.66)       |         | 77/89                            | 1.04 (0.64-1.69)  |         | 168/165                         | 1.13 (0.66-1.94) |         | 105/179                          | 0.98 (0.54-1.80) |         |
| CYP17A1 | rs10883782 | 10   | AA   | 227/211                                      | 1.00                   | 0.61    | 202/203                          | 1.00              | 0.06    | 274/297                         | 1.00             | 0.49    | 194/291                          | 1.00             | 0.64    |
|         |            |      | AG   | 105/84                                       | 1.21 (0.84-1.74)       |         | 80/108                           | 0.73 (0.50-1.07)  |         | 79/64                           | 1.35 (0.91-2.01) |         | 47/71                            | 1.09 (0.71-1.67) |         |
|         |            |      | GG   | 16/13                                        | 0.85 (0.37-1.92)       |         | 6/13                             | 0.52 (0.19-1.46)  |         | 4/7                             | 0.46 (0.13-1.70) |         | 3/3                              | 1.29 (0.25-6.59) |         |
| CYP17A1 | rs12413409 | 10   | GG   | 277/255                                      | 1.00                   | 0.53    | 236/264                          | 1.00              | 0.71    | 324/330                         | 1.00             | N/A     | 220/329                          | 1.00             | N/A     |
|         |            |      | GA   | 65/52                                        | 1.18 (0.76-1.82)       |         | 49/57                            | 0.95 (0.61-1.50)  |         | 34/35                           | 1.03 (0.61-1.73) |         | 26/39                            | 1.01 (0.58-1.76) |         |
|         |            |      | AA   | 4/4                                          | 1.00 (0.22-4.44)       |         | 4/2                              | 3.59 (0.55-23.35) |         | 0/1                             | N/A              |         | 0/0                              | N/A              |         |
| CYP17A1 | rs2486758  | 10   | AA   | 212/199                                      | 1.00                   | 0.25    | 178/206                          | 1.00              | 0.74    | 311/322                         | 1.00             | 0.51    | 218/318                          | 1.00             | N/A     |
|         |            |      | AG   | 118/104                                      | 1.14 (0.80-1.61)       |         | 102/103                          | 1.15 (0.79-1.66)  |         | 48/43                           | 1.29 (0.80-2.07) |         | 28/45                            | 0.91 (0.53-1.56) |         |
|         |            |      | GG   | 18/9                                         | 1.60 (0.66-3.84)       |         | 9/15                             | 0.48 (0.19-1.24)  |         | 1/3                             | 0.39 (0.04-4.15) |         | 0/5                              | N/A              |         |
| CYP17A1 | rs6162     | 10   | GG   | 120/101                                      | 1.00                   | 0.75    | 106/106                          | 1.00              | 0.85    | 134/138                         | 1.00             | 0.82    | 95/168                           | 1.00             | 0.42    |
|         |            |      | GA   | 162/149                                      | 0.95 (0.66-1.37)       |         | 136/162                          | 0.88 (0.6-1.3)    |         | 173/172                         | 1.09 (0.78-1.53) |         | 118/148                          | 1.45 (1.01-2.09) |         |
|         |            |      | AA   | 65/61                                        | 0.93 (0.58-1.49)       |         | 48/55                            | 0.99 (0.6-1.64)   |         | 53/57                           | 1.01 (0.63-1.63) |         | 33/52                            | 1 (0.59-1.71)    |         |
| CYP17A1 | rs619824   | 10   | CC   | 113/101                                      | 1.00                   | 1.00    | 97/104                           | 1.00              | 0.95    | 52/51                           | 1.00             | 0.71    | 29/48                            | 1.00             | 0.74    |
|         |            |      | CA   | 163/145                                      | 1.05 (0.72-1.52)       |         | 140/159                          | 0.98 (0.66-1.45)  |         | 159/164                         | 0.86 (0.54-1.38) |         | 116/174                          | 1.17 (0.68-2.01) |         |
|         |            |      | AA   | 72/66                                        | 0.99 (0.62-1.57)       |         | 53/60                            | 0.99 (0.60-1.63)  |         | 149/153                         | 0.88 (0.55-1.42) |         | 100/145                          | 1.15 (0.66-1.99) |         |
| CYP19A1 | rs10046    | 15   | AA   | 93/86                                        | 1.00                   | 0.60    | 82/93                            | 1.00              | 0.90    | 26/23                           | 1.00             | 0.26    | 16/21                            | 1.00             | 0.10    |
|         |            |      | AG   | 177/152                                      | 1.02 (0.69-1.51)       |         | 145/168                          | 0.96 (0.65-1.43)  |         | 145/134                         | 0.8 (0.42-1.53)  |         | 63/137                           | 0.59 (0.28-1.25) |         |
|         |            |      | GG   | 77/74                                        | 0.88 (0.55-1.39)       |         | 63/63                            | 1.05 (0.64-1.72)  |         | 189/211                         | 0.72 (0.38-1.34) |         | 165/209                          | 1.20 (0.59-2.45) |         |
| CYP19A1 | rs11575899 | 15   | II   | 140/132                                      | 1.00                   | 0.91    | 124/142                          | 1.00              | 0.68    | 178/174                         | 1.00             | 0.79    | 109/158                          | 1.00             | 0.87    |
|         |            |      | ID   | 169/141                                      | 1.12 (0.79-1.58)       |         | 138/143                          | 1.10 (0.77-1.58)  |         | 142/152                         | 0.94 (0.68-1.31) |         | 99/164                           | 0.85 (0.59-1.23) |         |
|         |            |      | DD   | 38/39                                        | 0.86 (0.50-1.48)       |         | 28/39                            | 0.77 (0.42-1.38)  |         | 38/41                           | 0.97 (0.58-1.62) |         | 37/45                            | 1.18 (0.7-1.99)  |         |
| CYP19A1 | rs2445765  | 15   | CC   | 243/207                                      | 1.00                   | 0.07    | 198/221                          | 1.00              | 0.89    | 213/211                         | 1.00             | 0.39    | 143/196                          | 1.00             | 0.11    |
|         |            |      | CG   | 100/95                                       | 0.78 (0.54-1.13)       |         | 85/90                            | 1.03 (0.70-1.50)  |         | 133/133                         | 0.96 (0.7-1.33)  |         | 88/142                           | 0.77 (0.53-1.1)  |         |
|         |            |      | GG   | 5/10                                         | 0.42 (0.13-1.32)       |         | 7/13                             | 0.81 (0.30-2.17)  |         | 14/23                           | 0.65 (0.31-1.35) |         | 15/30                            | 0.67 (0.34-1.35) |         |
| CYP19A1 | rs4775936  | 15   | GG   | 91/89                                        | 1.00                   | 0.23    | 75/86                            | 1.00              | 0.84    | 255/263                         | 1.00             | 0.56    | 192/275                          | 1.00             | 0.25    |
|         |            |      | GA   | 179/152                                      | 1.32 (0.89-1.95)       |         | 157/169                          | 1.13 (0.75-1.72)  |         | 93/93                           | 1.07 (0.74-1.53) |         | 46/84                            | 0.68 (0.44-1.05) |         |
|         |            |      | AA   | 77/70                                        | 1.32 (0.82-2.11)       |         | 57/69                            | 1.05 (0.63-1.74)  |         | 11/12                           | 1.28 (0.53-3.07) |         | 8/9                              | 1.18 (0.42-3.27) |         |
| CYP19A1 | rs700518   | 15   | GG   | 81/75                                        | 1.00                   | 0.46    | 68/84                            | 1.00              | 0.72    | 15/17                           | 1.00             | 0.60    | 12/14                            | 1.00             | 0.30    |
|         |            |      | GA   | 181/158                                      | 1.00 (0.67-1.50)       |         | 152/167                          | 1.06 (0.70-1.60)  |         | 127/120                         | 1 (0.46-2.16)    |         | 63/112                           | 0.68 (0.29-1.62) |         |
|         |            |      | AA   | 85/79                                        | 0.84 (0.52-1.34)       |         | 70/73                            | 1.09 (0.67-1.79)  |         | 218/231                         | 0.91 (0.43-1.93) |         | 170/241                          | 0.94 (0.41-2.16) |         |
| CYP19A1 | rs700519   | 15   | GG   | 329/290                                      | 1.00                   | N/A     | 268/302                          | 1.00              | N/A     | 261/254                         | 1.00             | 0.15    | 167/257                          | 1.00             | 0.41    |
|         |            |      | GA   | 19/20                                        | 0.71 (0.35-1.42)       |         | 21/22                            | 1.21 (0.62-2.35)  |         | 92/101                          | 0.87 (0.61-1.24) |         | 73/100                           | 1.22 (0.83-1.79) |         |
|         |            |      | AA   | 0/1                                          | N/A                    |         | 1/0                              | N/A               |         | 7/13                            | 0.45 (0.17-1.22) |         | 6/11                             | 1.01 (0.35-2.93) |         |
| CYP19A1 | rs727479   | 15   | AA   | 140/133                                      | 1.00                   | 0.99    | 122/139                          | 1.00              | 0.71    | 230/237                         | 1.00             | 0.94    | 158/223                          | 1.00             | 0.80    |
|         |            |      | AC   | 169/138                                      | 1.17 (0.82-1.65)       |         | 140/145                          | 1.09 (0.76-1.57)  |         | 114/114                         | 1.03 (0.73-1.44) |         | 73/131                           | 0.79 (0.55-1.14) |         |
|         |            |      | CC   | 39/40                                        | 0.87 (0.51-1.49)       |         | 28/40                            | 0.79 (0.44-1.41)  |         | 16/17                           | 0.98 (0.46-2.1)  |         | 15/14                            | 1.51 (0.69-3.32) |         |
| CYP19A1 | rs749292   | 15   | GG   | 94/90                                        | 1.00                   | 0.47    | 82/92                            | 1.00              | 0.89    | 110/101                         | 1.00             | 0.95    | 69/99                            | 1.00             | 0.30    |
|         |            |      | GA   | 179/154                                      | 1.2 (0.82-1.76)        |         | 156/170                          | 1.09 (0.72-1.63)  |         | 168/182                         | 0.85 (0.59-1.22) |         | 118/180                          | 0.85 (0.57-1.27) |         |
|         |            |      | AA   | 75/68                                        | 1.17 (0.74-1.87)       |         | 51/62                            | 1.02 (0.61-1.71)  |         | 82/85                           | 1 (0.65-1.54)    |         | 57/89                            | 0.78 (0.48-1.25) |         |

|        |           |    |    |         |                   |               |         |                   |             |         |                   |      |         |                   |      |
|--------|-----------|----|----|---------|-------------------|---------------|---------|-------------------|-------------|---------|-------------------|------|---------|-------------------|------|
| CYP1A1 | rs1378942 | 15 | AA | 140/109 | 1.00              | 0.53          | 89/131  | 1.00              | 0.07        | 6/5     | 1.00              | 0.07 | 3/6     | 1.00              | 0.77 |
|        |           |    | AC | 157/162 | 0.74 (0.52-1.06)  |               | 152/155 | 1.36 (0.94-1.98)  |             | 67/53   | 0.69 (0.18-2.65)  |      | 43/62   | 1.26 (0.28-5.79)  |      |
|        |           |    | CC | 51/41   | 0.99 (0.59-1.66)  |               | 49/36   | 1.53 (0.88-2.65)  |             | 286/310 | 0.44 (0.12-1.65)  |      | 200/300 | 1.31 (0.29-5.92)  |      |
| CYP1A1 | rs1799814 | 15 | CC | 294/276 | 1.00              | 0.31          | 261/278 | 1.00              | 0.06        | 356/363 | 1.00              | N/A  | 241/364 | 1.00              | N/A  |
|        |           |    | CA | 43/31   | 1.32 (0.78-2.23)  |               | 25/41   | 0.70 (0.40-1.22)  |             | 2/4     | 0.51 (0.09-3.01)  |      | 4/4     | 1.23 (0.28-5.33)  |      |
|        |           |    | AA | 8/5     | 1.26 (0.38-4.11)  |               | 1/4     | 0.10 (0.05-7.05)  |             | 0/0     | N/A               |      | 0/0     | N/A               |      |
| CYP1A2 | rs2470893 | 15 | GG | 204/188 | 1.00              | 0.73          | 156/162 | 1.00              | 0.82        | 318/334 | 1.00              | 0.06 | 217/334 | 1.00              | 0.38 |
|        |           |    | GA | 131/104 | 1.16 (0.82-1.63)  |               | 114/140 | 0.93 (0.65-1.33)  |             | 36/31   | 1.51 (0.87-2.62)  |      | 28/33   | 1.29 (0.73-2.26)  |      |
|        |           |    | AA | 13/20   | 0.55 (0.26-1.19)  |               | 20/22   | 1.00 (0.51-1.98)  |             | 4/2     | 3.72 (0.58-24.00) |      | 1/1     | 1.34 (0.08-23.28) |      |
| CYP1A2 | rs2472297 | 15 | GG | 250/233 | 1.00              | 1.00          | 193/211 | 1.00              | 0.72        | 328/340 | 1.00              | 0.12 | 225/340 | 1.00              | N/A  |
|        |           |    | GA | 91/71   | 1.18 (0.81-1.72)  |               | 82/102  | 0.90 (0.61-1.32)  |             | 29/27   | 1.39 (0.78-2.50)  |      | 21/27   | 1.09 (0.58-2.05)  |      |
|        |           |    | AA | 6/8     | 0.48 (0.16-1.44)  |               | 13/10   | 1.74 (0.72-4.19)  |             | 3/1     | 4.70 (0.44-50.58) |      | 0/1     | N/A               |      |
| CYP1A2 | rs2472304 | 15 | AA | 131/100 | 1.00              | 0.28          | 87/128  | 1.00              | 0.06        | 7/5     | 1.00              | 0.07 | 3/6     | 1.00              | 0.58 |
|        |           |    | AG | 163/161 | 0.73 (0.5-1.05)   |               | 149/157 | 1.33 (0.91-1.94)  |             | 69/61   | 0.59 (0.16-2.20)  |      | 46/69   | 1.22 (0.27-5.58)  |      |
|        |           |    | GG | 52/47   | 0.84 (0.51-1.4)   |               | 53/38   | 1.59 (0.93-2.73)  |             | 283/302 | 0.42 (0.12-1.54)  |      | 197/290 | 1.35 (0.3-6.11)   |      |
| CYP1A2 | rs762551  | 15 | AA | 168/134 | 1.00              | 0.21          | 133/167 | 1.00              | 0.14        | 129/119 | 1.00              | 0.31 | 84/131  | 1.00              | 0.82 |
|        |           |    | AC | 153/155 | 0.71 (0.51-1.01)  |               | 132/135 | 1.29 (0.91-1.85)  |             | 169/175 | 0.86 (0.61-1.21)  |      | 115/173 | 0.96 (0.66-1.39)  |      |
|        |           |    | CC | 26/23   | 0.94 (0.5-1.77)   |               | 25/21   | 1.4 (0.71-2.74)   |             | 62/73   | 0.81 (0.52-1.26)  |      | 47/64   | 1.08 (0.67-1.76)  |      |
| CYP1B1 | rs1056836 | 2  | GG | 107/101 | 1.00              | 0.53          | 85/90   | 1.00              | 0.79        | 28/19   | 1.00              | 0.62 | 9/20    | 1.00              | 0.75 |
|        |           |    | GC | 179/152 | 1.30 (0.90-1.90)  |               | 145/177 | 0.88 (0.59-1.31)  |             | 118/155 | 0.55 (0.29-1.07)  |      | 99/129  | 1.55 (0.65-3.71)  |      |
|        |           |    | CC | 61/58   | 1.1 (0.68-1.78)   |               | 59/57   | 1.11 (0.67-1.85)  |             | 214/194 | 0.74 (0.39-1.41)  |      | 138/219 | 1.31 (0.55-3.09)  |      |
| CYP1B1 | rs1800440 | 2  | AA | 229/222 | 1.00              | 0.23          | 198/217 | 1.00              | 0.59        | 334/342 | 1.00              | N/A  | 228/349 | 1.00              | N/A  |
|        |           |    | AG | 104/74  | 1.38 (0.95-2.00)  |               | 83/99   | 0.86 (0.59-1.25)  |             | 26/23   | 1.17 (0.63-2.18)  |      | 18/14   | 1.76 (0.82-3.78)  |      |
|        |           |    | GG | 15/12   | 1.01 (0.44-2.29)  |               | 9/8     | 1.09 (0.39-3.05)  |             | 0/1     | N/A               |      | 0/3     | N/A               |      |
| CYP2C9 | rs1057910 | 10 | AA | 299/257 | 1.00              | 0.49          | 243/275 | 1.00              | 0.64        | 341/352 | 1.00              | N/A  | 237/356 | 1.00              | N/A  |
|        |           |    | AC | 44/47   | 0.78 (0.49-1.25)  |               | 41/46   | 1.05 (0.64-1.71)  |             | 13/12   | 1.37 (0.57-3.26)  |      | 7/7     | 1.32 (0.44-3.99)  |      |
|        |           |    | CC | 3/2     | 1.63 (0.25-10.62) |               | 2/2     | 2.13 (0.28-15.98) |             | 1/0     | N/A               |      | 0/0     | N/A               |      |
| CYP3A4 | rs4987161 | 7  | AA | 340/308 | 1.00              | 0.51          | 284/319 | 1.00              | N/A         | 353/368 | 1.00              | N/A  | 242/366 | 1.00              | N/A  |
|        |           |    | AG | 7/2     | 3.4 (0.65-17.78)  |               | 6/5     | 1.38 (0.4-4.76)   |             | 7/0     | N/A               |      | 3/0     | N/A               |      |
|        |           |    | GG | 0/1     | N/A               |               | 0/0     | N/A               |             | 0/0     | N/A               |      | 0/0     | N/A               |      |
| CYP3A5 | rs776746  | 7  | GG | 297/260 | 1.00              | 0.21          | 242/281 | 1.00              | 0.80        | 37/44   | 1.00              | 0.32 | 17/35   | 1.00              | 0.20 |
|        |           |    | GA | 49/49   | 0.78 (0.49-1.24)  |               | 45/42   | 1.02 (0.62-1.7)   |             | 158/142 | 1.14 (0.67-1.93)  |      | 103/156 | 1.32 (0.68-2.57)  |      |
|        |           |    | AA | 2/2     | 0.29 (0.03-3.38)  |               | 3/1     | 1.78 (0.15-21.39) |             | 164/182 | 0.89 (0.52-1.52)  |      | 126/177 | 1.53 (0.78-2.98)  |      |
| CYP3A7 | rs2257401 | 7  | GG | 281/250 | 1.00              | 0.33          | 236/276 | 1.00              | 0.62        | 71/80   | 1.00              | 0.49 | 44/80   | 1.00              | 0.10 |
|        |           |    | GC | 63/56   | 0.94 (0.61-1.45)  |               | 50/47   | 1.08 (0.67-1.73)  |             | 194/182 | 1.18 (0.78-1.77)  |      | 121/193 | 1.11 (0.71-1.75)  |      |
|        |           |    | CC | 3/5     | 0.26 (0.05-1.36)  |               | 2/1     | 2.15 (0.18-25.68) |             | 88/101  | 0.88 (0.55-1.40)  |      | 77/93   | 1.5 (0.9-2.49)    |      |
| ESR1   | rs1801132 | 6  | GG | 197/216 | 1.00              | <b>0.0005</b> | 176/217 | 1.00              | <b>0.05</b> | 292/287 | 1.00              | 0.78 | 177/288 | 1.00              | 0.35 |
|        |           |    | GC | 125/91  | 1.48 (1.06-2.07)  |               | 92/94   | 1.22 (0.81-1.82)  |             | 63/80   | 0.94 (0.63-1.43)  |      | 66/73   | 1.27 (0.86-1.87)  |      |
|        |           |    | CC | 24/5    | 3.83 (1.57-9.36)  |               | 21/13   | 2.31 (1.03-5.20)  |             | 4/1     | 4.67 (0.49-44.84) |      | 3/5     | 0.77 (0.17-3.48)  |      |
| ESR1   | rs2046210 | 6  | GG | 128/135 | 1.00              | <b>0.03</b>   | 109/121 | 1.00              | 0.21        | 51/62   | 1.00              | 0.75 | 33/47   | 1.00              | 0.19 |
|        |           |    | GA | 166/148 | 1.09 (0.79-1.52)  |               | 127/162 | 0.93 (0.62-1.39)  |             | 167/164 | 1.21 (0.76-1.94)  |      | 116/152 | 0.99 (0.60-1.64)  |      |
|        |           |    | AA | 54/29   | 1.88 (1.14-3.09)  |               | 53/41   | 1.63 (0.92-2.89)  |             | 142/141 | 1.14 (0.70-1.84)  |      | 96/168  | 0.77 (0.46-1.30)  |      |
| ESR1   | rs2228480 | 6  | GG | 230/222 | 1.00              | 0.23          | 207/222 | 1.00              | 0.03        | 258/261 | 1.00              | 0.92 | 157/254 | 1.00              | 0.37 |
|        |           |    | GA | 103/76  | 1.24 (0.85-1.79)  |               | 76/89   | 0.81 (0.55-1.19)  |             | 82/93   | 0.89 (0.62-1.28)  |      | 82/100  | 1.32 (0.91-1.9)   |      |
|        |           |    | AA | 10/8    | 1.34 (0.50-3.62)  |               | 2/10    | 0.07 (0.01-0.67)  |             | 13/9    | 1.57 (0.64-3.86)  |      | 3/8     | 0.56 (0.14-2.26)  |      |
| ESR1   | rs2234693 | 6  | AA | 109/89  | 1.00              | 0.57          | 83/96   | 1.00              | 0.38        | 85/90   | 1.00              | 0.82 | 54/78   | 1.00              | 0.17 |
|        |           |    | AG | 173/160 | 0.93 (0.64-1.36)  |               | 145/171 | 0.97 (0.65-1.44)  |             | 178/179 | 1.02 (0.7-1.5)    |      | 137/176 | 1.19 (0.77-1.83)  |      |
|        |           |    | GG | 66/63   | 0.87 (0.54-1.41)  |               | 62/56   | 1.3 (0.78-2.15)   |             | 96/99   | 0.95 (0.62-1.47)  |      | 55/113  | 0.73 (0.45-1.2)   |      |

|         |            |    |    |         |                  |               |         |                   |             |         |                  |      |         |                  |      |
|---------|------------|----|----|---------|------------------|---------------|---------|-------------------|-------------|---------|------------------|------|---------|------------------|------|
| ESR1    | rs3020314  | 6  | AA | 141/169 | 1.00             | <b>0.0007</b> | 120/162 | 1.00              | <b>0.02</b> | 30/30   | 1.00             | 0.75 | 24/28   | 1.00             | 0.38 |
|         |            |    | AG | 163/123 | 1.54 (1.11-2.12) |               | 128/131 | 1.51 (1.01-2.24)  |             | 148/150 | 1.19 (0.64-2.22) |      | 95/147  | 0.58 (0.32-1.08) |      |
|         |            |    | GG | 44/20   | 2.25 (1.27-3.98) |               | 42/31   | 1.72 (0.94-3.15)  |             | 182/188 | 1.18 (0.63-2.19) |      | 127/193 | 0.62 (0.34-1.14) |      |
| ESR1    | rs3798577  | 6  | AA | 96/103  | 1.00             | 0.36          | 89/93   | 1.00              | 0.18        | 129/119 | 1.00             | 0.32 | 78/128  | 1.00             | 0.39 |
|         |            |    | AG | 181/147 | 1.31 (0.90-1.90) |               | 151/162 | 0.91 (0.61-1.35)  |             | 162/173 | 0.82 (0.58-1.17) |      | 110/170 | 1.02 (0.7-1.51)  |      |
|         |            |    | GG | 69/62   | 1.20 (0.75-1.91) |               | 49/68   | 0.7 (0.42-1.16)   |             | 68/75   | 0.82 (0.53-1.28) |      | 58/69   | 1.24 (0.78-1.99) |      |
| ESR1    | rs9383938  | 6  | CC | 286/252 | 1.00             | 0.56          | 226/267 | 1.00              | 0.13        | 268/251 | 1.00             | 0.32 | 164/264 | 1.00             | 0.28 |
|         |            |    | CA | 59/57   | 0.96 (0.62-1.47) |               | 60/54   | 1.38 (0.89-2.15)  |             | 84/107  | 0.81 (0.57-1.16) |      | 77/98   | 1.21 (0.84-1.76) |      |
|         |            |    | AA | 1/3     | 0.29 (0.03-2.94) |               | 4/3     | 1.61 (0.33-7.89)  |             | 8/10    | 0.93 (0.34-2.54) |      | 5/5     | 1.36 (0.36-5.13) |      |
| ESR1    | rs9397435  | 6  | AA | 292/265 | 1.00             | 0.58          | 231/276 | 1.00              | 0.07        | 298/304 | 1.00             | 0.63 | 202/300 | 1.00             | N/A  |
|         |            |    | AG | 54/45   | 1.14 (0.72-1.80) |               | 55/45   | 1.53 (0.97-2.43)  |             | 60/59   | 1.03 (0.68-1.55) |      | 44/66   | 1.05 (0.67-1.62) |      |
|         |            |    | GG | 2/2     | 1.09 (0.15-7.93) |               | 4/3     | 1.62 (0.33-7.93)  |             | 2/5     | 0.31 (0.05-1.77) |      | 0/2     | N/A              |      |
| ESR2    | rs1255998  | 14 | CC | 252/248 | 1.00             | 0.07          | 226/255 | 1.00              | 0.70        | 82/81   | 1.00             | 0.49 | 41/73   | 1.00             | 0.18 |
|         |            |    | CG | 92/58   | 1.67 (1.12-2.49) |               | 56/67   | 0.86 (0.56-1.33)  |             | 174/185 | 0.83 (0.56-1.24) |      | 127/192 | 1.37 (0.86-2.17) |      |
|         |            |    | GG | 3/5     | 0.53 (0.10-2.80) |               | 8/2     | 1.78 (0.27-11.88) |             | 99/101  | 0.85 (0.54-1.32) |      | 78/103  | 1.45 (0.87-2.42) |      |
| ESR2    | rs1256049  | 14 | GG | 327/302 | 1.00             | 0.26          | 274/296 | 1.00              | N/A         | 289/300 | 1.00             | 0.91 | 206/295 | 1.00             | 0.21 |
|         |            |    | GA | 21/7    | 2.11 (0.83-5.34) |               | 15/28   | 0.42 (0.2-0.88)   |             | 68/62   | 1.10 (0.73-1.64) |      | 38/67   | 0.77 (0.49-1.21) |      |
|         |            |    | AA | 0/1     | N/A              |               | 0/0     | N/A               |             | 2/5     | 0.56 (0.1-3.04)  |      | 2/6     | 0.60 (0.11-3.17) |      |
| ESR2    | rs1256065  | 14 | AA | 122/109 | 1.00             | 0.73          | 100/118 | 1.00              | 0.85        | 278/282 | 1.00             | 0.85 | 197/291 | 1.00             | 0.86 |
|         |            |    | AC | 162/140 | 1.05 (0.73-1.51) |               | 139/151 | 1.05 (0.72-1.54)  |             | 77/76   | 1.15 (0.78-1.7)  |      | 48/74   | 0.99 (0.64-1.52) |      |
|         |            |    | CC | 64/63   | 0.9 (0.57-1.42)  |               | 51/55   | 1.04 (0.63-1.72)  |             | 5/10    | 0.66 (0.21-2.07) |      | 1/2     | 0.63 (0.05-7.44) |      |
| ESR2    | rs2987983  | 14 | AA | 143/131 | 1.00             | 0.44          | 128/144 | 1.00              | 0.31        | 61/67   | 1.00             | 0.58 | 37/63   | 1.00             | 0.39 |
|         |            |    | AG | 153/143 | 0.98 (0.69-1.4)  |               | 120/142 | 1.05 (0.72-1.51)  |             | 164/172 | 1.03 (0.67-1.59) |      | 116/179 | 1.08 (0.66-1.76) |      |
|         |            |    | GG | 51/38   | 1.31 (0.78-2.20) |               | 41/37   | 1.39 (0.81-2.40)  |             | 134/129 | 1.12 (0.71-1.76) |      | 93/126  | 1.23 (0.73-2.05) |      |
| ESR2    | rs3020450  | 14 | GG | 143/127 | 1.00             | 0.56          | 128/138 | 1.00              | 0.28        | 126/128 | 1.00             | 0.94 | 87/121  | 1.00             | 0.57 |
|         |            |    | GA | 155/148 | 0.93 (0.65-1.32) |               | 122/150 | 1.04 (0.72-1.51)  |             | 167/168 | 1.02 (0.73-1.45) |      | 119/188 | 0.86 (0.59-1.25) |      |
|         |            |    | AA | 49/37   | 1.29 (0.77-2.18) |               | 40/36   | 1.43 (0.82-2.47)  |             | 67/70   | 1.01 (0.65-1.57) |      | 40/59   | 0.90 (0.54-1.50) |      |
| HSD17B2 | rs4445895  | 16 | GG | 116/95  | 1.00             | 0.23          | 114/126 | 1.00              | 0.41        | 156/177 | 1.00             | 0.27 | 112/175 | 1.00             | 0.52 |
|         |            |    | GA | 174/156 | 0.85 (0.59-1.23) |               | 127/153 | 0.99 (0.68-1.43)  |             | 162/149 | 1.19 (0.86-1.66) |      | 111/159 | 1.11 (0.78-1.59) |      |
|         |            |    | AA | 58/61   | 0.76 (0.47-1.22) |               | 48/45   | 1.30 (0.78-2.16)  |             | 42/42   | 1.24 (0.75-2.05) |      | 23/33   | 1.16 (0.63-2.13) |      |
| PR      | rs1042838  | 11 | CC | 246/200 | 1.00             | 0.57          | 202/235 | 1.00              | 0.52        | 339/330 | 1.00             | N/A  | 229/348 | 1.00             | 0.12 |
|         |            |    | CA | 87/101  | 0.77 (0.53-1.10) |               | 76/76   | 1.29 (0.87-1.92)  |             | 17/34   | 0.49 (0.26-0.95) |      | 14/15   | 1.65 (0.73-3.74) |      |
|         |            |    | AA | 11/5    | 2.04 (0.65-6.41) |               | 8/12    | 0.72 (0.25-2.06)  |             | 1/0     | N/A              |      | 1/0     | 1000452.09 (0-)  |      |
| SRD5A1  | rs3736316  | 5  | GG | 125/109 | 1.00             | 0.75          | 102/113 | 1.00              | 0.98        | 159/173 | 1.00             | 0.24 | 113/169 | 1.00             | 0.53 |
|         |            |    | GA | 166/148 | 0.95 (0.66-1.36) |               | 139/151 | 1.00 (0.68-1.46)  |             | 163/160 | 1.19 (0.86-1.64) |      | 102/164 | 0.96 (0.67-1.38) |      |
|         |            |    | AA | 57/55   | 0.93 (0.58-1.51) |               | 49/59   | 1.01 (0.61-1.66)  |             | 37/35   | 1.28 (0.74-2.2)  |      | 31/35   | 1.32 (0.76-2.31) |      |
| SRD5A1  | rs3822430  | 5  | AA | 127/109 | 1.00             | 0.62          | 105/114 | 1.00              | 0.91        | 160/174 | 1.00             | 0.25 | 113/169 | 1.00             | 0.51 |
|         |            |    | AG | 164/147 | 0.91 (0.64-1.31) |               | 135/149 | 0.97 (0.66-1.41)  |             | 162/159 | 1.18 (0.86-1.63) |      | 100/164 | 0.95 (0.66-1.36) |      |
|         |            |    | GG | 57/56   | 0.90 (0.56-1.45) |               | 50/60   | 0.98 (0.60-1.61)  |             | 37/35   | 1.27 (0.74-2.19) |      | 31/34   | 1.36 (0.77-2.38) |      |
| SRD5A2  | rs523349   | 2  | CC | 173/140 | 1.00             | 0.18          | 145/172 | 1.00              | 0.65        | 202/188 | 1.00             | 0.21 | 138/182 | 1.00             | 0.11 |
|         |            |    | CG | 151/141 | 0.89 (0.63-1.25) |               | 112/116 | 1.22 (0.84-1.77)  |             | 138/153 | 0.87 (0.63-1.2)  |      | 88/155  | 0.68 (0.47-0.97) |      |
|         |            |    | GG | 24/30   | 0.65 (0.35-1.21) |               | 33/35   | 0.97 (0.54-1.74)  |             | 20/27   | 0.7 (0.36-1.33)  |      | 20/31   | 0.84 (0.44-1.59) |      |
| UGT1A1  | rs10929302 | 2  | GG | 161/131 | 1.00             | 0.16          | 151/160 | 1.00              | 0.62        | 181/192 | 1.00             | 0.75 | 126/176 | 1.00             | 0.37 |
|         |            |    | GA | 155/142 | 0.94 (0.67-1.33) |               | 113/136 | 0.87 (0.61-1.24)  |             | 152/139 | 1.17 (0.85-1.63) |      | 101/161 | 0.85 (0.6-1.22)  |      |
|         |            |    | AA | 32/39   | 0.62 (0.35-1.08) |               | 26/28   | 0.97 (0.52-1.80)  |             | 27/34   | 0.91 (0.51-1.61) |      | 17/31   | 0.83 (0.43-1.6)  |      |
| UGT1A1  | rs4124874  | 2  | AA | 94/82   | 1.00             | 0.53          | 83/102  | 1.00              | 0.61        | 13/11   | 1.00             | 0.45 | 7/9     | 1.00             | 0.25 |
|         |            |    | AC | 180/150 | 1.18 (0.79-1.75) |               | 129/144 | 1.04 (0.7-1.56)   |             | 95/122  | 0.67 (0.27-1.67) |      | 68/119  | 0.72 (0.24-2.17) |      |
|         |            |    | CC | 74/80   | 0.85 (0.54-1.36) |               | 78/78   | 1.13 (0.71-1.79)  |             | 251/235 | 0.83 (0.34-2.05) |      | 171/239 | 0.97 (0.33-2.84) |      |

|         |           |   |    |         |                  |      |         |                  |      |         |                  |      |         |                  |      |
|---------|-----------|---|----|---------|------------------|------|---------|------------------|------|---------|------------------|------|---------|------------------|------|
| UGT1A6  | rs2070959 | 2 | AA | 145/118 | 1.00             | 0.76 | 142/138 | 1.00             | 0.51 | 213/236 | 1.00             | 0.42 | 129/207 | 1.00             | 0.77 |
|         |           |   | AG | 156/149 | 0.93 (0.65-1.32) |      | 118/157 | 0.71 (0.49-1.01) |      | 129/112 | 1.23 (0.88-1.72) |      | 106/131 | 1.37 (0.96-1.96) |      |
|         |           |   | GG | 47/42   | 0.95 (0.57-1.59) |      | 30/29   | 1.14 (0.63-2.06) |      | 17/20   | 0.97 (0.48-2)    |      | 9/29    | 0.58 (0.26-1.29) |      |
| UGT1A9  | rs6714486 | 2 | TT | 309/281 | 1.00             | N/A  | 249/286 | 1.00             | 0.72 | 253/265 | 1.00             | 0.39 | 186/248 | 1.00             | 0.06 |
|         |           |   | TA | 35/27   | 1.41 (0.8-2.47)  |      | 35/33   | 1.19 (0.68-2.06) |      | 93/85   | 1 (0.69-1.44)    |      | 55/102  | 0.68 (0.46-1.00) |      |
|         |           |   | AA | 0/0     | N/A              |      | 1/2     | 0.54 (0.04-6.57) |      | 12/14   | 0.54 (0.23-1.27) |      | 4/12    | 0.49 (0.15-1.64) |      |
| UGT2B15 | rs1902023 | 4 | AA | 91/80   | 1.00             | 0.06 | 78/86   | 1.00             | 0.45 | 55/69   | 1.00             | 0.64 | 36/73   | 1.00             | 0.43 |
|         |           |   | AC | 196/158 | 1.00 (0.68-1.49) |      | 145/164 | 0.89 (0.59-1.33) |      | 183/167 | 1.47 (0.95-2.27) |      | 138/187 | 1.51 (0.94-2.44) |      |
|         |           |   | CC | 60/73   | 0.60 (0.37-0.98) |      | 64/74   | 0.83 (0.51-1.36) |      | 121/132 | 1.23 (0.77-1.94) |      | 72/108  | 1.33 (0.79-2.24) |      |

Abbreviations: Geno, genotype; Ca/Co, numbers of cases and controls; OR, odds ratio; 95%CI, 95% confidence interval; EA, European American; AA, African American; P for trend $p$  value for linear trend.

<sup>a</sup> Adjusted for age at diagnosis (continuous), education (less than high school, high school, college and graduate school), family history of breast cancer (yes, no), history of benign breast disease (yes, no), menopausal status (premenopausal, postmenopausal), number of full pregnancies (continuous), breast feeding (yes, no, nulliparous), Hormone Replacement Therapy (HRT, yes, no), body mass index (continuous) and proportion of

<sup>b</sup> Stratified by the length of endogenous estrogen exposure using median in both EA and AA controls as the cutoff (longer or shorter than 384 months).
