# Supplementary material
Source: PubMed Central journal article supplement (PMC4214251)
Supplement: NIHMS635292-supplement-6.pdf [file NIHMS635292-supplement-6.pdf]

**Supplementary Table 5. ORs and 95% CIs of all SNPs among European American (EA) and African American (AA) women by HRT usage in WCHS.**

| Gene    | SNP        | Chr. | Geno | European American |                        |         |            |                  |         | African American |                   |         |            |                  |         |
|---------|------------|------|------|-------------------|------------------------|---------|------------|------------------|---------|------------------|-------------------|---------|------------|------------------|---------|
|         |            |      |      | HRT Use           |                        |         | No HRT Use |                  |         | HRT Use          |                   |         | No HRT Use |                  |         |
|         |            |      |      | Ca/Co             | OR(95%CI) <sup>a</sup> | P-trend | Ca/Co      | OR(95%CI)        | P-trend | Ca/Co            | OR(95%CI)         | P-trend | Ca/Co      | OR(95%CI)        | P-trend |
| COMT    | rs4633     | 22   | GG   | 23/27             | 1.00                   | 0.96    | 40/46      | 1.00             | 0.84    | 7/4              | 1.00              | 0.93    | 23/28      | 1.00             | 0.78    |
|         |            |      | GA   | 75/66             | 1.34 (0.66-2.72)       |         | 82/72      | 1.19 (0.66-2.13) |         | 32/25            | 1.15 (0.26-5.04)  |         | 96/110     | 1.03 (0.53-2.00) |         |
|         |            |      | AA   | 35/40             | 1.08 (0.5-2.37)        |         | 42/36      | 1.06 (0.53-2.13) |         | 38/33            | 1.06 (0.24-4.74)  |         | 104/123    | 0.95 (0.49-1.85) |         |
| CYP17A1 | rs10883782 | 10   | AA   | 92/91             | 1.00                   | 0.90    | 102/100    | 1.00             | 0.41    | 61/49            | 1.00              | 0.62    | 165/210    | 1.00             | 0.13    |
|         |            |      | AG   | 36/34             | 1.08 (0.59-2.00)       |         | 53/46      | 1.2 (0.7-2.06)   |         | 14/14            | 0.66 (0.26-1.66)  |         | 54/48      | 1.60 (1.00-2.57) |         |
|         |            |      | GG   | 5/7               | 0.73 (0.2-2.68)        |         | 10/6       | 1.41 (0.43-4.65) |         | 1/0              | 1244161.16 (0-)   |         | 3/3        | 0.65 (0.11-3.83) |         |
| CYP17A1 | rs12413409 | 10   | GG   | 110/105           | 1.00                   | 0.87    | 131/126    | 1.00             | N/A     | 66/59            | 1.00              | N/A     | 198/242    | 1.00             | N/A     |
|         |            |      | GA   | 19/26             | 0.68 (0.33-1.39)       |         | 34/25      | 1.26 (0.66-2.44) |         | 10/4             | 1.7 (0.45-6.41)   |         | 25/19      | 1.44 (0.75-2.79) |         |
|         |            |      | AA   | 4/2               | 3.06 (0.44-21.02)      |         | 0/2        | N/A              |         | 0/0              | N/A               |         | 0/0        | N/A              |         |
| CYP17A1 | rs2486758  | 10   | AA   | 84/85             | 1.00                   | 0.82    | 95/96      | 1.00             | 0.41    | 68/54            | 1.00              | N/A     | 196/228    | 1.00             | 0.96    |
|         |            |      | AG   | 44/44             | 1.04 (0.59-1.82)       |         | 60/52      | 1.34 (0.8-2.27)  |         | 9/9              | 0.79 (0.26-2.36)  |         | 27/32      | 1.07 (0.60-1.93) |         |
|         |            |      | GG   | 5/4               | 1.21 (0.27-5.33)       |         | 11/6       | 1.04 (0.32-3.37) |         | 0/0              | N/A               |         | 1/2        | 0.57 (0.04-8.04) |         |
| CYP17A1 | rs6162     | 10   | GG   | 44/39             | 1.00                   | 0.50    | 64/51      | 1.00             | 0.12    | 31/26            | 1.00              | 0.95    | 86/105     | 1.00             | 0.90    |
|         |            |      | GA   | 55/71             | 0.72 (0.39-1.33)       |         | 77/72      | 0.81 (0.47-1.39) |         | 35/27            | 1.19 (0.55-2.59)  |         | 109/119    | 1.2 (0.79-1.83)  |         |
|         |            |      | AA   | 33/23             | 1.42 (0.66-3.04)       |         | 25/30      | 0.56 (0.27-1.15) |         | 11/9             | 0.93 (0.31-2.79)  |         | 29/38      | 0.93 (0.51-1.70) |         |
| CYP17A1 | rs619824   | 10   | CC   | 40/39             | 1.00                   | 0.32    | 61/53      | 1.00             | 0.27    | 12/8             | 1.00              | 0.58    | 28/42      | 1.00             | 0.78    |
|         |            |      | CA   | 57/69             | 0.84 (0.46-1.55)       |         | 80/73      | 0.93 (0.54-1.6)  |         | 36/29            | 0.83 (0.27-2.52)  |         | 104/115    | 1.26 (0.7-2.29)  |         |
|         |            |      | AA   | 36/25             | 1.54 (0.73-3.27)       |         | 25/28      | 0.64 (0.31-1.32) |         | 29/26            | 0.74 (0.24-2.22)  |         | 91/104     | 1.18 (0.64-2.16) |         |
| CYP19A1 | rs10046    | 15   | AA   | 34/34             | 1.00                   | 0.40    | 42/46      | 1.00             | 0.89    | 6/5              | 1.00              | 0.59    | 18/13      | 1.00             | 0.28    |
|         |            |      | AG   | 73/71             | 1.09 (0.58-2.04)       |         | 87/67      | 1.46 (0.8-2.66)  |         | 27/25            | 0.7 (0.18-2.79)   |         | 82/95      | 0.48 (0.21-1.08) |         |
|         |            |      | GG   | 26/28             | 0.67 (0.30-1.51)       |         | 36/41      | 1.03 (0.51-2.08) |         | 44/33            | 1.01 (0.27-3.82)  |         | 123/154    | 0.49 (0.22-1.09) |         |
| CYP19A1 | rs11575899 | 15   | II   | 52/57             | 1.00                   | 0.78    | 68/74      | 1.00             | 0.32    | 33/35            | 1.00              | 0.21    | 110/111    | 1.00             | 0.22    |
|         |            |      | ID   | 67/61             | 1.22 (0.69-2.18)       |         | 81/59      | 1.7 (0.99-2.9)   |         | 33/23            | 1.44 (0.66-3.13)  |         | 88/116     | 0.78 (0.52-1.18) |         |
|         |            |      | DD   | 14/15             | 0.68 (0.27-1.72)       |         | 16/21      | 1.09 (0.48-2.49) |         | 10/5             | 1.99 (0.56-7.11)  |         | 25/35      | 0.74 (0.4-1.38)  |         |
| CYP19A1 | rs2445765  | 15   | CC   | 86/90             | 1.00                   | .61606  | 113/101    | 1.00             | 0.43    | 42/35            | 1.00              | 0.61    | 138/148    | 1.00             | 0.21    |
|         |            |      | CG   | 44/39             | 1.10 (0.61-1.97)       |         | 51/49      | 0.85 (0.5-1.45)  |         | 30/25            | 0.95 (0.45-2)     |         | 79/100     | 0.89 (0.6-1.34)  |         |
|         |            |      | GG   | 3/4               | 1.51 (0.29-7.83)       |         | 2/4        | 0.55 (0.08-3.52) |         | 5/3              | 2.29 (0.43-12.23) |         | 7/14       | 0.46 (0.16-1.28) |         |
| CYP19A1 | rs4775936  | 15   | GG   | 30/29             | 1.00                   | 0.80    | 44/52      | 1.00             | 0.60    | 56/43            | 1.00              | 0.68    | 155/198    | 1.00             | 0.06    |
|         |            |      | GA   | 78/74             | 1.54 (0.77-3.08)       |         | 86/65      | 1.59 (0.89-2.84) |         | 20/19            | 0.85 (0.37-1.93)  |         | 59/57      | 1.33 (0.84-2.12) |         |
|         |            |      | AA   | 25/30             | 1.13 (0.5-2.58)        |         | 35/36      | 1.13 (0.56-2.27) |         | 1/1              | 0.79 (0.04-16.13) |         | 10/7       | 2.88 (0.98-8.22) |         |
| CYP19A1 | rs700518   | 15   | GG   | 27/30             | 1.00                   | 0.85    | 40/40      | 1.00             | 0.65    | 2/4              | 1.00              | 0.74    | 12/10      | 1.00             | 0.18    |
|         |            |      | GA   | 76/76             | 1.17 (0.6-2.27)        |         | 87/70      | 1.30 (0.70-2.41) |         | 28/20            | 2.21 (0.34-14.23) |         | 76/82      | 0.54 (0.21-1.4)  |         |
|         |            |      | AA   | 29/27             | 0.91 (0.4-2.07)        |         | 39/44      | 0.86 (0.42-1.74) |         | 47/39            | 2.04 (0.33-12.57) |         | 136/170    | 0.48 (0.19-1.21) |         |
| CYP19A1 | rs700519   | 15   | GG   | 125/122           | 1.00                   | N/A     | 157/141    | 1.00             | N/A     | 58/39            | 1.00              | 0.06    | 165/186    | 1.00             | 0.28    |
|         |            |      | GA   | 8/11              | 0.78 (0.26-2.31)       |         | 9/11       | 0.62 (0.22-1.72) |         | 18/23            | 0.4 (0.17-0.92)   |         | 56/65      | 0.97 (0.62-1.52) |         |
|         |            |      | A/A  | 0/0               | N/A                    |         | 0/1        | N/A              |         | 1/1              | 0.56 (0.03-11.2)  |         | 3/11       | 0.31 (0.08-1.22) |         |
| CYP19A1 | rs727479   | 15   | AA   | 52/57             | 1.00                   | 0.81    | 68/73      | 1.00             | 0.29    | 44/39            | 1.00              | 0.41    | 143/162    | 1.00             | 0.39    |
|         |            |      | AC   | 67/60             | 1.26 (0.7-2.24)        |         | 81/60      | 1.68 (0.98-2.88) |         | 29/23            | 1.15 (0.54-2.43)  |         | 70/86      | 0.86 (0.57-1.3)  |         |

|         |           |    |    |         |                   |      |         |                   |      |       |                   |      |         |                  |       |
|---------|-----------|----|----|---------|-------------------|------|---------|-------------------|------|-------|-------------------|------|---------|------------------|-------|
|         |           |    | CC | 14/15   | 0.69 (0.27-1.73)  |      | 17/21   | 1.14 (0.51-2.58)  |      | 4/1   | 3.3 (0.31-34.61)  |      | 11/14   | 0.76 (0.31-1.87) |       |
| CYP19A1 | rs749292  | 15 | GG | 29/32   | 1.00              | 0.50 | 48/51   | 1.00              | 0.94 | 25/20 | 1.00              | 0.96 | 73/65   | 1.00             | 0.25  |
|         |           |    | GA | 78/69   | 1.83 (0.92-3.66)  |      | 85/72   | 1.18 (0.67-2.07)  |      | 37/32 | 0.88 (0.39-1.98)  |      | 99/132  | 0.62 (0.39-0.98) |       |
|         |           |    | AA | 26/32   | 1.35 (0.6-3.04)   |      | 33/31   | 0.98 (0.48-2.01)  |      | 15/11 | 1.02 (0.35-2.97)  |      | 52/65   | 0.75 (0.45-1.27) |       |
| CYP1A1  | rs1378942 | 15 | AA | 53/56   | 1.00              | 0.06 | 60/51   | 1.00              | 0.24 | 1/2   | 1.00              | 0.22 | 4/1     | 1.00             | 0.003 |
|         |           |    | AC | 54/64   | 1.09 (0.61-1.97)  |      | 81/82   | 0.71 (0.41-1.24)  |      | 9/8   | 3.89 (0.25-61.37) |      | 44/37   | 0.11 (0.01-1.19) |       |
|         |           |    | CC | 26/13   | 2.51 (1.08-5.83)  |      | 25/21   | 0.68 (0.3-1.51)   |      | 67/53 | 5.38 (0.39-74.39) |      | 176/224 | 0.06 (0.01-0.64) |       |
| CYP1A1  | rs1799814 | 15 | CC | 114/114 | 1.00              | 0.32 | 143/133 | 1.00              | 0.78 | 75/63 | 1.00              | N/A  | 222/258 | 1.00             | N/A   |
|         |           |    | CA | 15/16   | 0.78 (0.34-1.79)  |      | 18/17   | 1.11 (0.51-2.42)  |      | 2/0   | N/A               |      | 1/4     | 0.42 (0.04-4.06) |       |
|         |           |    | AA | 3/3     | 0.46 (0.08-2.69)  |      | 3/3     | 1.12 (0.19-6.72)  |      | 0/0   | N/A               |      | 0/0     | N/A              |       |
| CYP1A2  | rs2470893 | 15 | GG | 79/78   | 1.00              | 0.81 | 94/88   | 1.00              | 0.76 | 72/58 | 1.00              | 0.52 | 199/244 | 1.00             | N/A   |
|         |           |    | GA | 47/49   | 1.10 (0.63-1.92)  |      | 64/56   | 1.07 (0.64-1.81)  |      | 4/4   | 0.73 (0.16-3.38)  |      | 20/18   | 1.66 (0.79-3.46) |       |
|         |           |    | AA | 7/6     | 1.00 (0.29-3.49)  |      | 8/10    | 0.65 (0.21-1.96)  |      | 1/1   | 0.43 (0.02-9.07)  |      | 3/0     | N/A              |       |
| CYP1A2  | rs2472297 | 15 | GG | 94/96   | 1.00              | 0.25 | 114/111 | 1.00              | 0.54 | 73/59 | 1.00              | N/A  | 206/245 | 1.00             | N/A   |
|         |           |    | GA | 33/36   | 1.09 (0.6-2)      |      | 47/38   | 1.06 (0.6-1.86)   |      | 3/4   | 0.44 (0.08-2.33)  |      | 16/17   | 1.39 (0.64-3.02) |       |
|         |           |    | AA | 6/1     | 5.97 (0.63-56.85) |      | 4/5     | 0.33 (0.07-1.54)  |      | 1/0   | N/A               |      | 2/0     | N/A              |       |
| CYP1A2  | rs2472304 | 15 | AA | 48/50   | 1.00              | 0.06 | 57/49   | 1.00              | 0.22 | 2/2   | 1.00              | 0.15 | 4/1     | 1.00             | 0.01  |
|         |           |    | AG | 59/69   | 1.06 (0.59-1.89)  |      | 81/80   | 0.69 (0.39-1.21)  |      | 8/11  | 1.12 (0.1-12.11)  |      | 47/42   | 0.10 (0.01-1.11) |       |
|         |           |    | GG | 25/12   | 2.66 (1.12-6.32)  |      | 28/24   | 0.67 (0.31-1.43)  |      | 67/50 | 2.39 (0.26-22.25) |      | 172/218 | 0.06 (0.01-0.64) |       |
| CYP1A2  | rs762551  | 15 | AA | 59/62   | 1.00              | 0.09 | 72/67   | 1.00              | 0.68 | 30/21 | 1.00              | 0.85 | 83/84   | 1.00             | 0.14  |
|         |           |    | AC | 58/65   | 1.09 (0.62-1.91)  |      | 80/77   | 0.75 (0.44-1.28)  |      | 33/31 | 0.76 (0.34-1.69)  |      | 104/130 | 0.7 (0.45-1.07)  |       |
|         |           |    | CC | 16/6    | 3.32 (1.14-9.67)  |      | 14/10   | 1.13 (0.44-2.93)  |      | 14/11 | 1.01 (0.34-3.03)  |      | 37/47   | 0.7 (0.4-1.24)   |       |
| CYP1B1  | rs1056836 | 2  | GG | 46/45   | 1.00              | 0.84 | 48/49   | 1.00              | 0.93 | 7/4   | 1.00              | 0.26 | 13/9    | 1.00             | 0.82  |
|         |           |    | GC | 58/60   | 0.99 (0.54-1.82)  |      | 91/77   | 1.75 (0.98-3.11)  |      | 24/28 | 0.34 (0.07-1.63)  |      | 77/108  | 0.62 (0.23-1.63) |       |
|         |           |    | CC | 28/28   | 1.09 (0.53-2.24)  |      | 26/27   | 0.8 (0.36-1.78)   |      | 46/31 | 0.82 (0.17-4)     |      | 134/145 | 0.73 (0.28-1.91) |       |
| CYP1B1  | rs1800440 | 2  | AA | 85/97   | 1.00              | 0.20 | 109/109 | 1.00              | 0.12 | 70/60 | 1.00              | 0.40 | 208/241 | 1.00             | N/A   |
|         |           |    | AG | 44/32   | 1.59 (0.88-2.87)  |      | 51/40   | 1.41 (0.82-2.44)  |      | 7/3   | 1.98 (0.41-9.55)  |      | 16/17   | 1.14 (0.53-2.44) |       |
|         |           |    | GG | 4/3     | 1.12 (0.23-5.51)  |      | 6/3     | 2.36 (0.51-10.85) |      | 0/0   | N/A               |      | 0/2     | N/A              |       |
| CYP2C9  | rs1057910 | 10 | AA | 114/111 | 1.00              | N/A  | 137/130 | 1.00              | N/A  | 76/61 | 1.00              | N/A  | 213/251 | 1.00             | N/A   |
|         |           |    | AC | 17/20   | 0.75 (0.35-1.64)  |      | 26/20   | 1.48 (0.73-3.00)  |      | 0/2   | N/A               |      | 8/9     | 1.12 (0.4-3.19)  |       |
|         |           |    | CC | 0/1     | N/A               |      | 2/0     | N/A               |      | 0/0   | N/A               |      | 0/0     | N/A              |       |
| CYP3A4  | rs4987161 | 7  | AA | 131/131 | 1.00              | N/A  | 160/152 | 1.00              | N/A  | 77/63 | 1.00              | N/A  | 220/261 | 1.00             | N/A   |
|         |           |    | AG | 1/1     | 0.94 (0.05-17.02) |      | 6/1     | 7.06 (0.75-66.01) |      | 0/0   | N/A               |      | 4/0     | N/A              |       |
|         |           |    | GG | 0/1     | N/A               |      | 0/0     | N/A               |      | 0/0   | N/A               |      | 0/0     | N/A              |       |
| CYP3A5  | rs776746  | 7  | GG | 112/109 | 1.00              | N/A  | 143/131 | 1.00              | N/A  | 6/13  | 1.00              | 0.02 | 24/29   | 1.00             | 0.57  |
|         |           |    | GA | 20/23   | 0.87 (0.42-1.79)  |      | 22/23   | 0.75 (0.36-1.53)  |      | 28/27 | 1.82 (0.54-6.19)  |      | 100/103 | 0.98 (0.5-1.89)  |       |
|         |           |    | AA | 1/0     | N/A               |      | 1/0     | N/A               |      | 43/23 | 3.96 (1.14-13.72) |      | 99/130  | 0.87 (0.45-1.68) |       |
| CYP3A7  | rs2257401 | 7  | GG | 105/109 | 1.00              | 0.68 | 134/126 | 1.00              | 0.52 | 16/24 | 1.00              | 0.08 | 46/55   | 1.00             | 0.49  |
|         |           |    | GC | 27/22   | 1.26 (0.63-2.49)  |      | 30/27   | 0.87 (0.45-1.68)  |      | 34/23 | 1.99 (0.82-4.87)  |      | 120/130 | 0.96 (0.58-1.59) |       |
|         |           |    | CC | 1/1     | 0.12 (0.01-45.9)  |      | 1/1     | 0.31 (0.01-6.33)  |      | 26/16 | 2.39 (0.9-6.32)   |      | 55/74   | 0.83 (0.47-1.46) |       |
| ESR1    | rs1801132 | 6  | GG | 74/88   | 1.00              | 0.02 | 94/104  | 1.00              | 0.08 | 58/53 | 1.00              | 0.18 | 173/203 | 1.00             | N/A   |
|         |           |    | GC | 45/42   | 1.38 (0.77-2.46)  |      | 61/47   | 1.38 (0.81-2.36)  |      | 18/8  | 3.03 (1.07-8.59)  |      | 47/58   | 0.98 (0.61-1.58) |       |

|         |           |    |    |         |                   |       |         |                   |      |       |                   |      |         |                   |      |
|---------|-----------|----|----|---------|-------------------|-------|---------|-------------------|------|-------|-------------------|------|---------|-------------------|------|
|         |           |    | CC | 14/3    | 5.25 (1.35-20.41) |       | 9/3     | 3.17 (0.69-14.46) |      | 1/2   | 0.52 (0.04-7.11)  |      | 3/0     | N/A               |      |
| ESR1    | rs2046210 | 6  | GG | 54/48   | 1.00              | 0.61  | 63/66   | 1.00              | 0.02 | 10/12 | 1.00              | 0.17 | 32/40   | 1.00              | 0.66 |
|         |           |    | GA | 57/68   | 0.76 (0.42-1.36)  |       | 82/78   | 1.16 (0.69-1.97)  |      | 33/31 | 1.32 (0.46-3.79)  |      | 108/111 | 1.08 (0.61-1.92)  |      |
|         |           |    | AA | 22/17   | 0.91 (0.39-2.12)  |       | 21/10   | 3.69 (1.44-9.43)  |      | 34/20 | 2.03 (0.68-6.07)  |      | 84/110  | 0.93 (0.52-1.67)  |      |
| ESR1    | rs2228480 | 6  | GG | 94/98   | 1.00              | 0.55  | 109/106 | 1.00              | 0.30 | 53/40 | 1.00              | 0.62 | 153/186 | 1.00              | 0.30 |
|         |           |    | GA | 33/32   | 1.00 (0.54-1.87)  |       | 50/40   | 1.26 (0.72-2.21)  |      | 18/22 | 0.59 (0.26-1.33)  |      | 57/65   | 1.19 (0.76-1.85)  |      |
|         |           |    | AA | 4/2     | 3.08 (0.45-21.28) |       | 5/4     | 1.7 (0.4-7.3)     |      | 4/1   | 2.64 (0.25-28.12) |      | 9/7     | 1.55 (0.53-4.51)  |      |
| ESR1    | rs2234693 | 6  | AA | 33/39   | 1.00              | 0.18  | 62/40   | 1.00              | 0.11 | 26/13 | 1.00              | 0.31 | 46/65   | 1.00              | 0.97 |
|         |           |    | AG | 69/66   | 1.51 (0.79-2.86)  |       | 80/85   | 0.58 (0.33-1.02)  |      | 31/34 | 0.34 (0.13-0.88)  |      | 114/115 | 1.28 (0.78-2.1)   |      |
|         |           |    | GG | 31/28   | 1.65 (0.77-3.57)  |       | 24/28   | 0.61 (0.28-1.31)  |      | 19/16 | 0.58 (0.21-1.63)  |      | 64/81   | 1.02 (0.59-1.76)  |      |
| ESR1    | rs3020314 | 6  | AA | 50/71   | 1.00              | 0.009 | 75/75   | 1.00              | 0.29 | 9/8   | 1.00              | 0.87 | 12/19   | 1.00              | 0.25 |
|         |           |    | AG | 66/52   | 1.97 (1.12-3.48)  |       | 71/70   | 0.94 (0.56-1.56)  |      | 33/22 | 1.61 (0.47-5.56)  |      | 89/107  | 1.49 (0.63-3.5)   |      |
|         |           |    | GG | 17/10   | 2.65 (1.00-7.17)  |       | 20/9    | 2.53 (0.93-6.91)  |      | 35/33 | 1.17 (0.33-4.12)  |      | 123/136 | 1.68 (0.72-3.94)  |      |
| ESR1    | rs3798577 | 6  | AA | 38/46   | 1.00              | 0.22  | 43/47   | 1.00              | 0.27 | 24/17 | 1.00              | 0.39 | 81/75   | 1.00              | 0.48 |
|         |           |    | AG | 64/63   | 1.22 (0.67-2.24)  |       | 91/79   | 1.34 (0.75-2.41)  |      | 33/28 | 0.83 (0.34-2.03)  |      | 94/133  | 0.61 (0.39-0.95)  |      |
|         |           |    | GG | 31/24   | 1.61 (0.76-3.39)  |       | 30/28   | 1.48 (0.71-3.06)  |      | 20/18 | 0.65 (0.24-1.74)  |      | 48/53   | 0.9 (0.53-1.54)   |      |
| ESR1    | rs9383938 | 6  | CC | 111/106 | 1.00              | 0.24  | 135/128 | 1.00              | N/A  | 60/42 | 1.00              | N/A  | 161/185 | 1.00              | 0.68 |
|         |           |    | CA | 19/26   | 0.61 (0.3-1.25)   |       | 31/24   | 1.39 (0.71-2.71)  |      | 17/19 | 0.71 (0.3-1.69)   |      | 55/70   | 0.95 (0.61-1.47)  |      |
|         |           |    | AA | 1/1     | 1.09 (0.06-18.91) |       | 0/2     | N/A               |      | 0/2   | N/A               |      | 8/7     | 1.83 (0.6-5.59)   |      |
| ESR1    | rs9397435 | 6  | AA | 114/113 | 1.00              | 0.77  | 139/132 | 1.00              | 0.42 | 68/46 | 1.00              | 0.06 | 183/220 | 1.00              | 0.30 |
|         |           |    | AG | 18/19   | 0.86 (0.4-1.84)   |       | 26/21   | 1.38 (0.67-2.82)  |      | 8/16  | 0.33 (0.12-0.90)  |      | 40/41   | 1.28 (0.77-2.13)  |      |
|         |           |    | GG | 1/1     | 1.18 (0.07-20.06) |       | 1/1     | 1.05 (0.06-18.58) |      | 1/1   | 0.6 (0.03-11.39)  |      | 1/1     | 2.18 (0.12-41.16) |      |
| ESR2    | rs1255998 | 14 | CC | 101/102 | 1.00              | 0.42  | 122/122 | 1.00              | 0.79 | 19/11 | 1.00              | 0.43 | 40/66   | 1.00              | 0.07 |
|         |           |    | CG | 29/29   | 1.05 (0.55-2.02)  |       | 43/29   | 1.29 (0.71-2.35)  |      | 37/34 | 0.54 (0.2-1.48)   |      | 112/130 | 1.58 (0.95-2.63)  |      |
|         |           |    | GG | 3/1     | 5.34 (0.46-62.43) |       | 1/3     | 0.21 (0.01-3.59)  |      | 21/18 | 0.58 (0.18-1.85)  |      | 68/66   | 1.72 (0.98-3.03)  |      |
| ESR2    | rs1256049 | 14 | GG | 126/123 | 1.00              | N/A   | 154/143 | 1.00              | N/A  | 62/47 | 1.00              | N/A  | 186/218 | 1.00              | 0.81 |
|         |           |    | GA | 7/8     | 0.97 (0.31-3.04)  |       | 12/11   | 0.61 (0.23-1.59)  |      | 13/16 | 0.58 (0.23-1.48)  |      | 37/37   | 1.15 (0.67-1.95)  |      |
|         |           |    | AA | 0/0     | N/A               |       | 0/0     | N/A               |      | 1/0   | N/A               |      | 1/6     | 0.23 (0.02-2.19)  |      |
| ESR2    | rs1256065 | 14 | AA | 52/52   | 1.00              | 0.74  | 54/60   | 1.00              | 0.49 | 56/51 | 1.00              | 0.14 | 183/203 | 1.00              | 0.21 |
|         |           |    | AC | 57/59   | 1.00 (0.56-1.77)  |       | 84/64   | 1.59 (0.91-2.78)  |      | 19/11 | 2.25 (0.84-6.03)  |      | 40/53   | 0.84 (0.51-1.39)  |      |
|         |           |    | CC | 24/22   | 1.17 (0.54-2.5)   |       | 28/30   | 1.14 (0.57-2.28)  |      | 2/1   | 1.66 (0.12-22.94) |      | 1/5     | 0.21 (0.02-1.93)  |      |
| ESR2    | rs2987983 | 14 | AA | 54/46   | 1.00              | 0.88  | 70/69   | 1.00              | 0.32 | 18/12 | 1.00              | 0.45 | 33/42   | 1.00              | 0.43 |
|         |           |    | AG | 57/77   | 0.49 (0.27-0.89)  |       | 69/66   | 1.12 (0.65-1.92)  |      | 30/28 | 0.58 (0.22-1.55)  |      | 106/127 | 0.97 (0.56-1.7)   |      |
|         |           |    | GG | 22/10   | 1.72 (0.68-4.35)  |       | 26/19   | 1.51 (0.7-3.24)   |      | 29/23 | 0.63 (0.23-1.76)  |      | 84/93   | 1.19 (0.67-2.12)  |      |
| ESR2    | rs3020450 | 14 | GG | 53/45   | 1.00              | 0.89  | 69/66   | 1.00              | 0.29 | 30/29 | 1.00              | 0.84 | 66/81   | 1.00              | 0.19 |
|         |           |    | GA | 58/78   | 0.50 (0.28-0.89)  |       | 71/70   | 1.1 (0.64-1.88)   |      | 34/21 | 1.4 (0.63-3.11)   |      | 105/128 | 0.98 (0.63-1.52)  |      |
|         |           |    | AA | 22/10   | 1.72 (0.68-4.36)  |       | 26/18   | 1.58 (0.73-3.43)  |      | 13/13 | 0.78 (0.28-2.13)  |      | 53/52   | 1.48 (0.86-2.53)  |      |
| HSD17B2 | rs4445895 | 16 | GG | 36/49   | 1.00              | 0.57  | 69/52   | 1.00              | 0.30 | 29/28 | 1.00              | 0.60 | 100/126 | 1.00              | 0.34 |
|         |           |    | GA | 78/55   | 1.87 (1.03-3.42)  |       | 71/80   | 0.54 (0.31-0.93)  |      | 42/29 | 1.31 (0.6-2.82)   |      | 95/104  | 1.21 (0.8-1.83)   |      |
|         |           |    | AA | 19/29   | 1.06 (0.49-2.3)   |       | 26/22   | 0.86 (0.41-1.8)   |      | 6/6   | 1.15 (0.29-4.5)   |      | 29/31   | 1.27 (0.68-2.35)  |      |
| PR      | rs1042838 | 11 | CC | 97/84   | 1.00              | 0.48  | 121/107 | 1.00              | 0.49 | 73/57 | 1.00              | 0.54 | 207/235 | 1.00              | 0.40 |
|         |           |    | CA | 29/43   | 0.64 (0.35-1.18)  |       | 41/41   | 0.87 (0.49-1.54)  |      | 3/6   | 0.6 (0.12-3.06)   |      | 13/25   | 0.52 (0.23-1.15)  |      |

|         |            |   |    |         |                  |      |         |                  |      |       |       |                  |                  |         |                  |  |
|---------|------------|---|----|---------|------------------|------|---------|------------------|------|-------|-------|------------------|------------------|---------|------------------|--|
|         |            |   | AA | 6/5     | 1.45 (0.37-5.65) |      | 2/2     | 0.43 (0.03-5.43) |      | N/A   |       | 2/0              | 1490593.49 (0-.) |         |                  |  |
| SRD5A1  | rs3736316  | 5 | GG | 49/47   | 1.00             | 0.72 | 61/49   | 1.00             | 0.15 | 37/34 | 1.00  | 0.25             | 96/116           | 1.00    | 0.33             |  |
|         |            |   | GA | 64/66   | 0.99 (0.55-1.79) |      | 79/75   | 0.79 (0.46-1.37) |      |       | 33/24 | 1.49 (0.67-3.29) |                  | 100/121 | 1.08 (0.72-1.62) |  |
|         |            |   | AA | 20/20   | 1.21 (0.53-2.77) |      | 26/30   | 0.58 (0.28-1.22) |      |       | 7/5   | 1.89 (0.47-7.58) |                  | 28/25   | 1.43 (0.74-2.75) |  |
| SRD5A1  | rs3822430  | 5 | AA | 50/47   | 1.00             | 0.86 | 62/49   | 1.00             | 0.12 | 37/34 | 1.00  | 0.25             | 95/116           | 1.00    | 0.29             |  |
|         |            |   | AG | 63/65   | 0.96 (0.53-1.74) |      | 78/75   | 0.75 (0.43-1.29) |      |       | 33/24 | 1.49 (0.67-3.29) |                  | 99/121  | 1.09 (0.73-1.64) |  |
|         |            |   | GG | 20/21   | 1.11 (0.49-2.53) |      | 26/30   | 0.56 (0.27-1.18) |      |       | 7/5   | 1.89 (0.47-7.58) |                  | 28/24   | 1.48 (0.77-2.87) |  |
| SRD5A2  | rs523349   | 2 | CC | 71/64   | 1.00             | 0.15 | 79/68   | 1.00             | 0.97 | 45/35 | 1.00  | 0.65             | 132/131          | 1.00    | 0.21             |  |
|         |            |   | CG | 56/56   | 0.96 (0.56-1.67) |      | 73/71   | 1 (0.6-1.68)     |      |       | 29/26 | 0.76 (0.36-1.6)  |                  | 76/112  | 0.7 (0.47-1.05)  |  |
|         |            |   | GG | 6/13    | 0.29 (0.09-0.94) |      | 14/13   | 1.02 (0.4-2.58)  |      |       | 3/2   | 1.25 (0.16-9.56) |                  | 16/19   | 0.91 (0.42-1.94) |  |
| UGT1A1  | rs10929302 | 2 | GG | 69/56   | 1.00             | 0.08 | 70/72   | 1.00             | 0.90 | 44/28 | 1.00  | 0.12             | 108/137          | 1.00    | 0.29             |  |
|         |            |   | GA | 50/59   | 0.73 (0.42-1.28) |      | 80/67   | 1.16 (0.69-1.96) |      |       | 28/26 | 0.62 (0.29-1.33) |                  | 100/103 | 1.37 (0.92-2.05) |  |
|         |            |   | AA | 14/18   | 0.48 (0.2-1.17)  |      | 16/15   | 0.9 (0.38-2.15)  |      |       | 5/9   | 0.42 (0.11-1.62) |                  | 15/21   | 1.07 (0.5-2.3)   |  |
| UGT1A1  | rs4124874  | 2 | AA | 43/31   | 1.00             | 0.08 | 39/47   | 1.00             | 0.48 | 2/1   | 1.00  | 0.21             | 7/8              | 1.00    | 0.28             |  |
|         |            |   | AC | 64/67   | 0.71 (0.37-1.34) |      | 88/70   | 1.78 (0.98-3.24) |      |       | 21/15 | 0.91 (0.07-11.8) |                  | 57/82   | 0.98 (0.3-3.22)  |  |
|         |            |   | CC | 26/35   | 0.51 (0.24-1.08) |      | 39/37   | 1.25 (0.63-2.5)  |      |       | 54/47 | 0.51 (0.04-6.12) |                  | 160/172 | 1.27 (0.4-4.06)  |  |
| UGT1A6  | rs2070959  | 2 | AA | 62/52   | 1.00             | 0.26 | 68/61   | 1.00             | 0.84 | 47/33 | 1.00  | 0.15             | 130/166          | 1.00    | 0.32             |  |
|         |            |   | AG | 53/63   | 0.7 (0.4-1.24)   |      | 76/75   | 0.99 (0.58-1.68) |      |       | 27/25 | 0.64 (0.3-1.38)  |                  | 80/81   | 1.27 (0.84-1.91) |  |
|         |            |   | GG | 18/16   | 0.72 (0.31-1.66) |      | 22/17   | 1.13 (0.5-2.52)  |      |       | 3/5   | 0.39 (0.07-2.07) |                  | 13/15   | 1.18 (0.51-2.75) |  |
| UGT1A9  | rs6714486  | 2 | TT | 128/118 | 1.00             | N/A  | 145/135 | 1.00             | N/A  | 50/41 | 1.00  | 0.47             | 168/189          | 1.00    | 0.08             |  |
|         |            |   | TA | 5/13    | 0.31 (0.1-0.97)  |      | 19/17   | 1.19 (0.55-2.6)  |      |       | 24/18 | 0.95 (0.43-2.13) |                  | 49/63   | 0.73 (0.46-1.16) |  |
|         |            |   | AA | 0/0     | N/A              |      | N/A     |                  |      |       | 2/4   | 0.39 (0.06-2.52) |                  | 6/8     | 0.46 (0.14-1.53) |  |
| UGT2B15 | rs1902023  | 4 | AA | 37/38   | 1.00             | 0.44 | 47/38   | 1.00             | 0.06 | 10/15 | 1.00  | 0.88             | 37/45            | 1.00    | 0.77             |  |
|         |            |   | AC | 69/62   | 0.96 (0.51-1.79) |      | 91/77   | 0.80 (0.44-1.45) |      |       | 49/29 | 2.68 (0.99-7.28) |                  | 110/124 | 1.14 (0.66-1.96) |  |
|         |            |   | CC | 26/32   | 0.73 (0.34-1.56) |      | 28/39   | 0.44 (0.21-0.95) |      |       | 18/19 | 1.33 (0.43-4.07) |                  | 76/93   | 0.97 (0.54-1.72) |  |

Abbreviations: Geno, genotype; Ca/Co, numbers of cases and controls; OR, odds ratio; 95%CI, 95% confidence interval; EA, European American; AA, African American; P for trend, *p* value for linear trend.

<sup>a</sup> Adjusted for age at diagnosis (continuous), education (less than high school, high school, college and graduate school), family history of breast cancer (yes, no), history of benign breast disease (yes, no), menopausal status (premenopausal, postmenopausal), number of full pregnancies (continuous), breast feeding (yes, no, nulliparous), estrogenmonth (continuous), body mass index (continuous) and proportion of European ancestry (continuous).
